# Supplementary material
Source: PubMed Central journal article supplement (PMC9077476)
Supplement: mmc1.pdf [file mmc1.pdf]

## Supplemental Information

### **Mitochondrial fragmentation is crucial for *c-Myc*-driven hepatoblastoma-like liver tumors**

**Dalin Wang, Jiming Tian, Zeyu Yan, Qing Yuan, Dan Wu, Xiaoli Liu, Shirong Yang, Shanshan Guo, Jianxun Wang, Yongxiu Yang, Jinliang Xing, Jiaze An, and Qichao Huang**

## Supplemental Figures

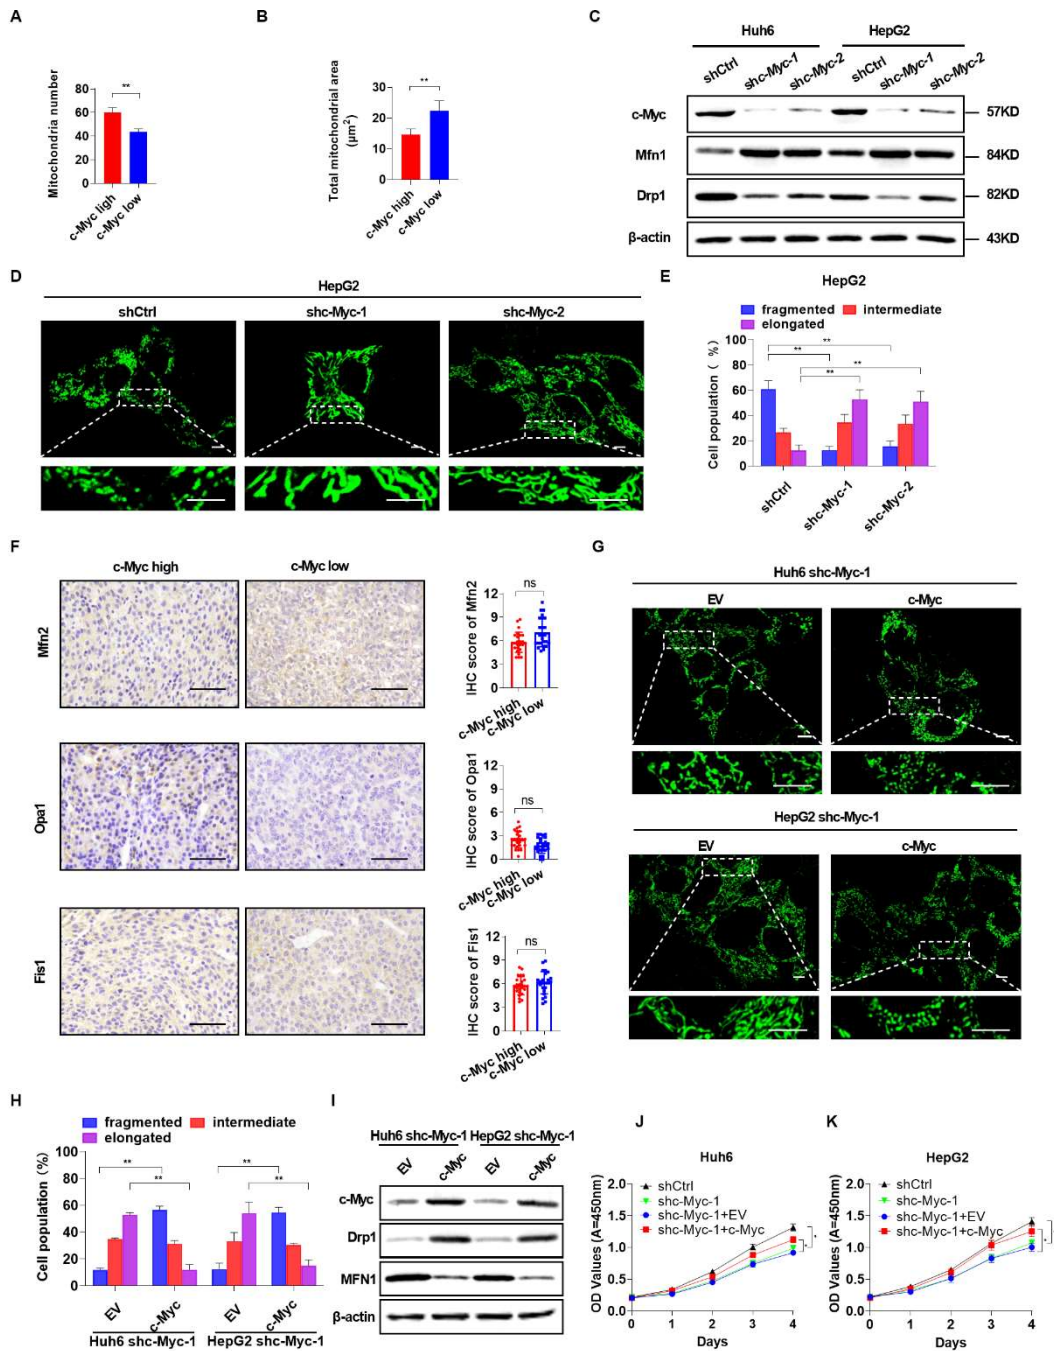

1

2 **Figure S1.**

3 (A) The number and (B) total area of mitochondria were analyzed from five random fields

4 ( $120\mu\text{m}^2$ ) in HB tissues with high (n=5) or low (n=5) expression levels of c-Myc.

5 (C) Western blotting images of c-Myc, Mfn1 and Drp1 in Huh6 and HepG2 cells with

6 treatment as indicated. shctrl, control shRNA; shc-Myc-1 and shc-Myc-2, shRNA against c-  
7 Myc.

8 **(D and E)** Representative confocal microscopy images and morphology distribution analysis  
9 of mitochondria in HepG2 cells with or without c-Myc knockdown. Scale bars: 10  $\mu$ m.

10 **(F)** Representative immunohistochemical (IHC) staining images of Mfn2, Opa1 and Fis1 in  
11 HB tissues with high (n=25) and low (n=25) c-Myc expression. Scale bar: 50 $\mu$ m.

12 **(G and H)** Representative confocal microscopy images and morphology distribution analyses  
13 of mitochondria in c-Myc knockdown HB cells with or without c-Myc overexpression. Scale  
14 bars: 10  $\mu$ m. EV, empty vector; c-Myc, expression vector encoding c-Myc.

15 **(I)** Western blotting images of c-Myc, Drp1 and Mfn1 in HB cells with treatment as indicated.

16 **(J and K)** Cell proliferation was analyzed by CCK-8 in HB cells with treatment as indicated.

17 Data were expressed as mean  $\pm$  SD. ns, no significant; \*p< 0.05; \*\*p< 0.01.

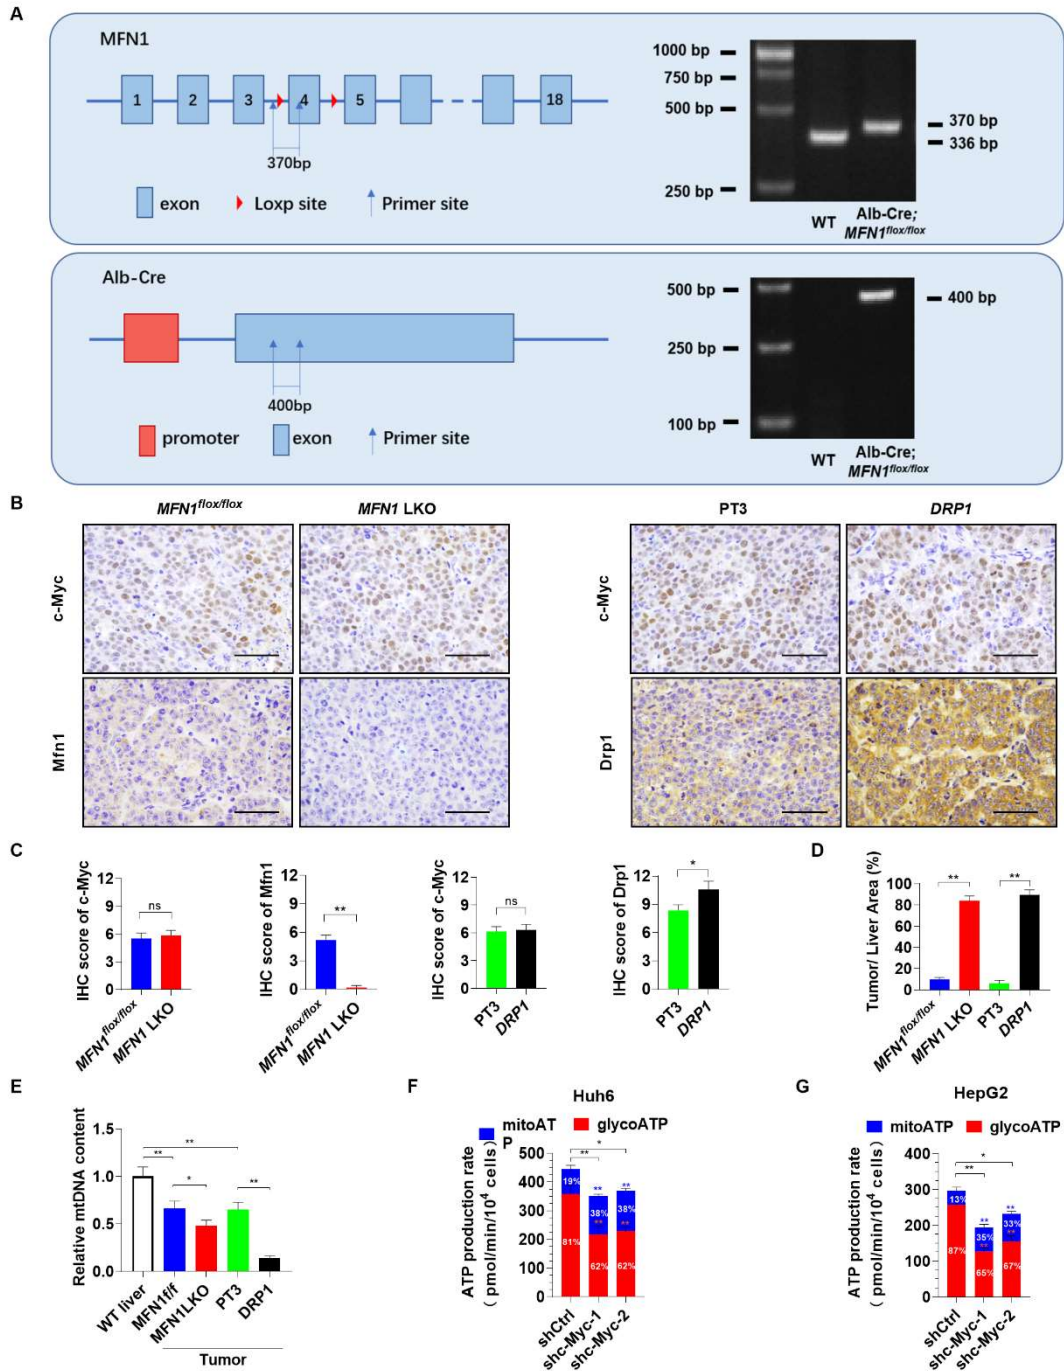

18

19 **Figure S2.**

20 **(A)** Schematic diagram of LoxP site in the exons of *MFN1* and Cre recombinant protease with  
 21 ALB promoter. Genomic DNA extracted from the tail of the mice was used for genotype  
 22 identification by performing PCR and agarose gel electrophoresis. WT, wild type.

23 **(B)** Representative immunohistochemical (IHC) staining images of c-Myc and Mfn1 in *c-Myc*

24 induced models with (n=12) or without (n=12) liver specifically knockout of *MFN1*. While  
25 representative IHC staining images of c-Myc and Drp1 in mouse models induced by *c-Myc*  
26 and PT3 control plasmids (n=12) or *c-Myc* plasmid and *DRP1* expression construct (n=12).  
27 Scale bar: 50 $\mu$ m. *MFN1*<sup>fl $\alpha$ /fl $\alpha$</sup> , *MFN1*<sup>fl $\alpha$ /fl $\alpha$</sup>  mice hydrodynamically injected with *c-Myc*  
28 plasmid and SB transposon; *MFN1* LKO, *MFN1* liver specific knockout mice  
29 hydrodynamically injected with *c-Myc* plasmid and SB transposon; PT3, wild type mice  
30 hydrodynamically injected with *c-Myc* plasmid and PT3-EF1 $\alpha$  empty vector, as well as SB  
31 transposon; *DRP1*, wild type mice hydrodynamically injected with *c-Myc* plasmid and PT3-  
32 EF1 $\alpha$ -DRP1 construct, as well as SB transposon.

33 **(C)** IHC scores of c-Myc, Mfn1 and Drp1 in mouse models induced as indicated.

34 **(D)** Percentage of tumor/liver area of the mice with treatment as indicated.

35 **(E)** Relative mtDNA content in mouse normal liver and the tumors induced by c-Myc from  
36 different groups as indicated.

37 **(F and G)** Glyco, Mito and total ATP production rate were measured between HB cells  
38 treated as indicated. Blue asterisks are used for Mito ATP, red asterisks are used for Glyco  
39 ATP, and black asterisks are used for total ATP (glycol ATP + Mito ATP) production rate  
40 comparisons between shctrl and shc-Myc groups. The percentage inside the bar represents the  
41 percentage of total ATP production rate generated from Glyco or Mito ATP production rate for  
42 each condition.

43 Data were expressed as mean  $\pm$  SD. ns, no significant; \*p< 0.05; \*\*p< 0.01.

44

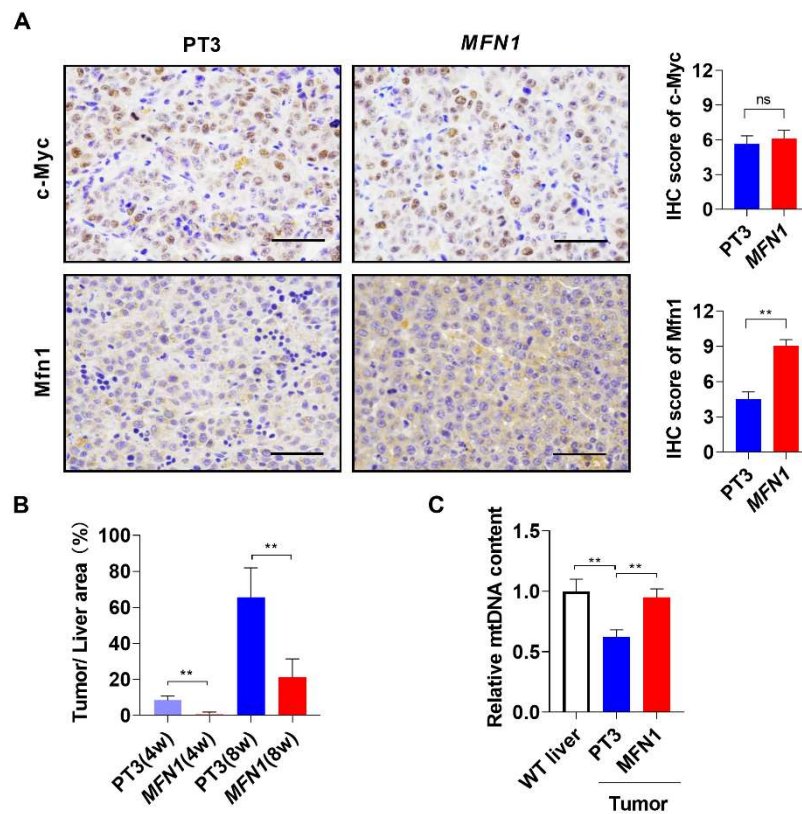

45

46 **Figure S3.**

47 **(A)** Representative IHC staining images and IHC scores of c-Myc and Mfn1 in mouse models  
 48 induced by *c-Myc* and PT3 control plasmids (n=12) or *c-Myc* plasmids and *MFN1* expression  
 49 construct (n=12). Scale bar: 50 $\mu$ m. PT3, wild type mice hydrodynamically injected with *c-*  
 50 *Myc* plasmid and PT3-EF1 $\alpha$  empty vector, as well as SB transposon; *MFN1*, wild type mice  
 51 hydrodynamically injected with *c-Myc* plasmid and PT3-EF1 $\alpha$ -MFN1 construct, as well as  
 52 SB transposon.

53 **(B)** Percentage of tumor/liver area of the mice with treatment as indicated.

54 **(C)** Relative mtDNA content in mouse normal liver and the tumors induced by *c-Myc* from  
 55 different groups as indicated.

56 Data were expressed as mean  $\pm$  SD. ns, no significant; \*\*p< 0.01.

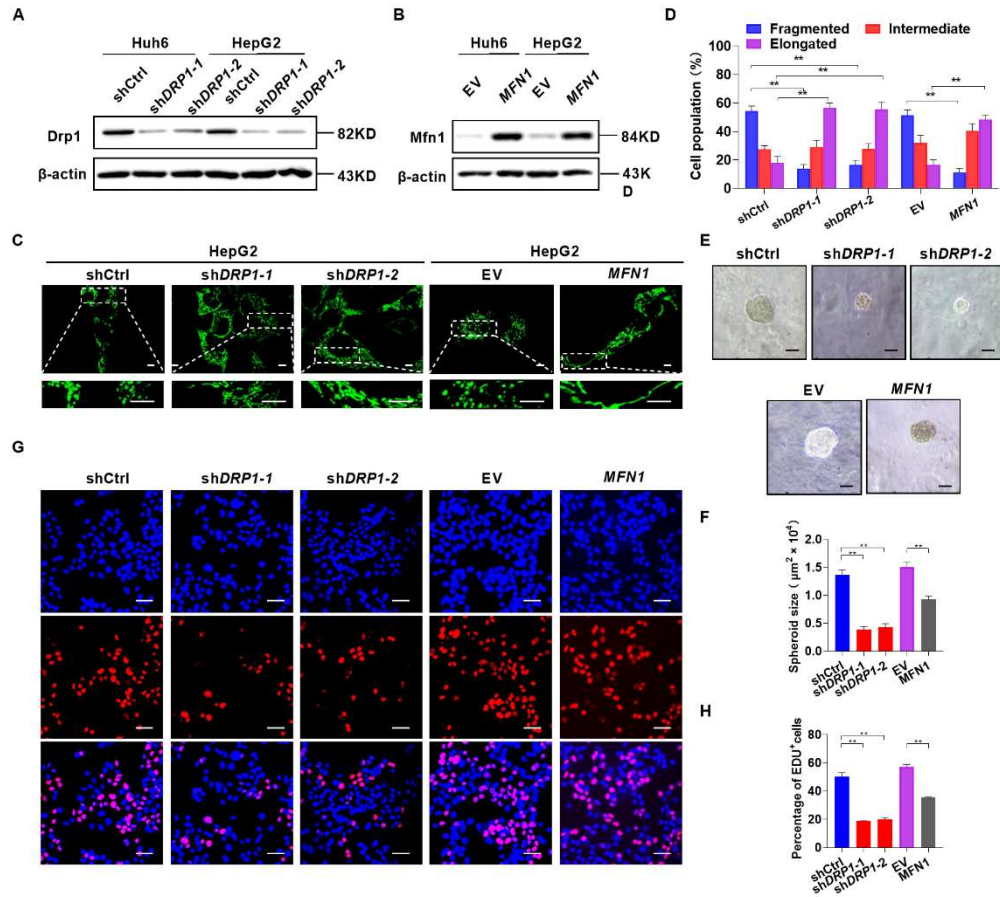

57

58 **Figure S4.**

59 **(A and B)** Western blotting images of Drp1 and Mfn1 in Huh6 and HepG2 treated as  
 60 indicated. shctrl, control shRNA; shDRP1-1 and shDRP1-2, shRNA against DRP1; EV, empty  
 61 vector; MFN1, expression vector encoding MFN1.

62 **(C-D)** Representative confocal microscopy images morphology distribution analyses of  
 63 mitochondria in HepG2 cells with treatment as indicated. Scale bars: 10 $\mu$ m.

64 **(E and F)** High-magnification images and size of spheres formed on day 7 by HepG2 cells  
 65 with treatment as indicated. Scale bar: 50 $\mu$ m.

66 **(G and H)** EdU assay was performed to evaluate proliferation ability of HepG2 cells with  
 67 treatment as indicated. Scale bar: 50 $\mu$ m

68 Data were expressed as mean  $\pm$  SD. \*\*p < 0.01.

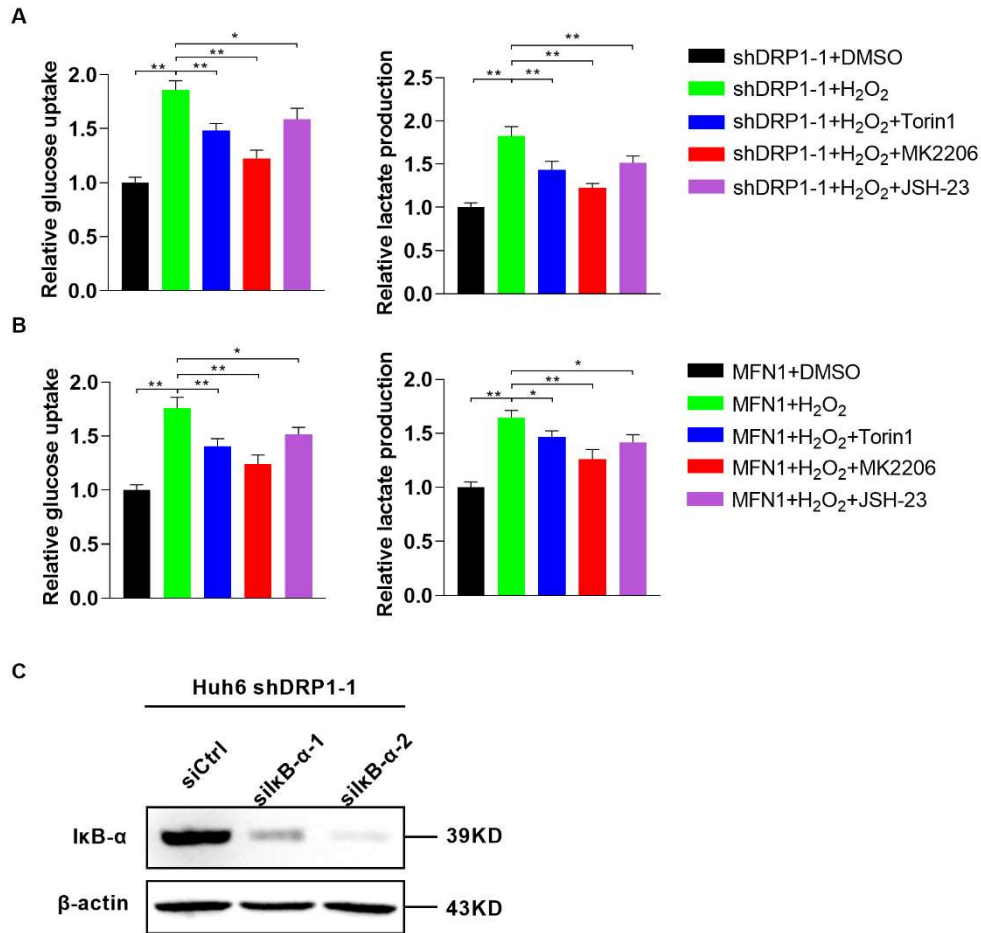

69

70 **Figure S5.**

71 **(A-B)** Relative glucose uptake and relative lactate production were measured in Huh6 cells

72 treated as indicated. shctrl, control shRNA; sh*DRP1-1*, shRNA against *DRP1*; *MFN1*,

73 expression vector encoding *MFN1*.

74 **(C)** Western blotting images of IκB-α in Huh6 treated as indicated.

75 Data were expressed as mean ± SD. \*p < 0.05; \*\*p < 0.01.



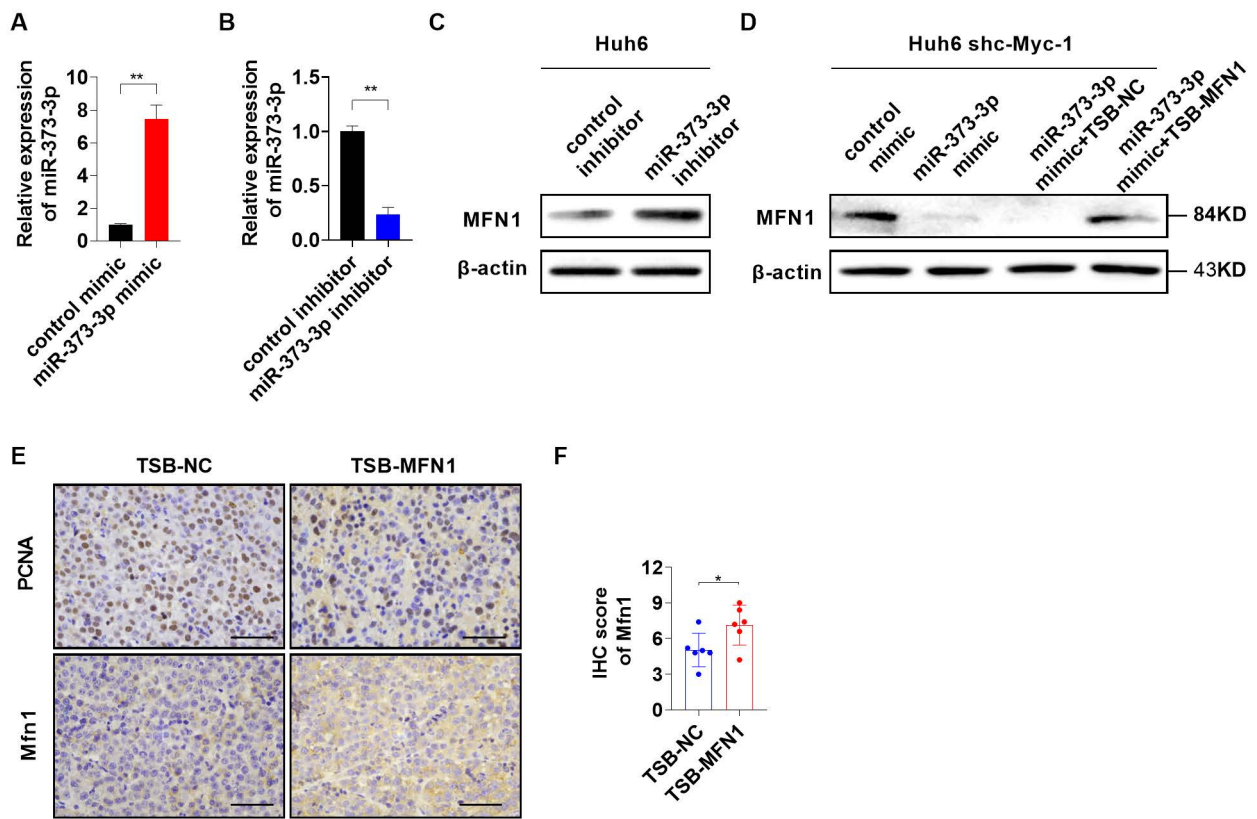

76

77 **Figure S6.**

78 **(A and B)** Quantitative real-time reverse transcription PCR (qRT-PCR) analyses for  
 79 expression levels of miR-373-3p in Huh6 treated as indicated.

80 **(C and D)** Western blotting images of Mfn1 in Huh6 cells treated as indicated. shc-Myc-1,  
 81 shRNA against c-Myc, TSB-NC, negative control of miRNA target site blocker; TSB-MFN1,  
 82 a target site blocker which selectively prevents miR-373-3p binding to the 3'UTR of MFN1.

83 **(E)** Representative immunohistochemical (IHC) staining images of PCNA and MFN1 in  
 84 subcutaneous xenograft tumors. Scale bar: 50  $\mu$ m.

85 **(F)** IHC scores of MFN1 in subcutaneous xenograft tumors.

86 Data were expressed as mean  $\pm$  SD. \* $p$  < 0.05; \*\* $p$  < 0.01.

87

88

89

## Supplemental Tables

90 **Table S1. Distribution of HB patients' characteristics**

| Variable                     | All patients, n=50 |
|------------------------------|--------------------|
| <b>Age</b>                   |                    |
| <5 years                     | 44                 |
| >=5 years                    | 6                  |
| <b>Gender</b>                |                    |
| Female                       | 30                 |
| Male                         | 20                 |
| <b>Tumor size</b>            |                    |
| <5.0 cm                      | 21                 |
| >=5 cm                       | 29                 |
| <b>Differentiation grade</b> |                    |
| well                         | 18                 |
| Moderately                   | 18                 |
| Poor                         | 14                 |
| <b>pretext stage</b>         |                    |
| I+ II                        | 23                 |
| III+ IV                      | 27                 |
| <b>Survival</b>              |                    |
| Dead                         | 13                 |
| Alive                        | 37                 |

91

92

93

94

95 **Table S2. Sequences of primers, siRNA, miRNA mimic and inhibitor, TSB, and mRNA**

96 **sequence for shRNA**

| <b>Primer name</b>                   | <b>Sequences</b>                        |
|--------------------------------------|-----------------------------------------|
| <b>1. Primers for real-time PCR:</b> |                                         |
| <i>c-Myc</i>                         | forward primer: CATACATCCTGTCCGTCCAAG   |
|                                      | reverse primer: GAGTTCCGTAGCTGTTCAAGT   |
| <i>DRP1</i>                          | forward primer: GGAGACTCATCTTTGGTGAAGAG |
|                                      | reverse primer: AAGGAGCCAGTCAAATTATTGC  |
| <i>MFN1</i>                          | forward primer: TGGCTAAGAAGGCGATTACTGC  |
|                                      | reverse primer: TCTCCGAGATAGCACCTCACC   |
| <i>GAPDH</i>                         | forward primer: GGAGCGAGATCCCTCCAAAAT   |
|                                      | reverse primer: GGCTGTTGTCATACTTCTCATGG |
| miR-373-3p                           | RT primer: CTCAACTGGTGTCGTGGAGTCGGCA    |
|                                      | forward primer: TCGGCAGGCTTCACGAAGCTAA  |
|                                      | reverse primer: GGTGTCGTGGAGTCGGCAATTC  |
| miR-200a-3p                          | RT primer: CTCAACTGGTGTCGTGGAGTCGGCA    |
|                                      | forward primer: TCGGCAGGATTGTGACAGACCA  |
|                                      | reverse primer: GGTGTCGTGGAGTCGGCAATTC  |
| miR-4319                             | RT primer: CTCAACTGGTGTCGTGGAGTCGGCA    |
|                                      | forward primer: TCGGCAGGAGGGACTCGTT     |
|                                      | reverse primer: GGTGTCGTGGAGTCGGCAATTC  |
| miR-302c-3p                          | RT primer: CTCAACTGGTGTCGTGGAGTCGGCA    |
|                                      | forward primer: TCGGCAGGATTCACGAAGGTAC  |
|                                      | reverse primer: GGTGTCGTGGAGTCGGCAATTC  |
| miR-3129-5p                          | RT primer: CTCAACTGGTGTCGTGGAGTCGGCA    |
|                                      | forward primer: TCGGCAGGCGTCATCACATCTC  |
|                                      | reverse primer: GGTGTCGTGGAGTCGGCAATTC  |

---

## 2. Primers for gene cloning

|             |                 |                            |
|-------------|-----------------|----------------------------|
| <i>DRP1</i> | forward primer: | CCGGAATTCTAGCCAGTCTCCACAT  |
|             | reverse primer: | CGCGGATCCGGCCCCGTGTTTTTCAG |
| <i>MFN1</i> | forward primer: | ACGAATTCCTTGCCACCATGGCAGA  |
|             | reverse primer: | ACCTCGAGTGTTAGGATTCTTCATT  |

---

## 3. Primers for DRP1 promoter construct

|                  |                 |                                           |
|------------------|-----------------|-------------------------------------------|
| (-1894/+103)DRP1 | forward primer: | <u>TAGGTACCA</u> CTCCTGACCTCAAGTG         |
| (-961/+103)DRP1  | forward primer: | <u>TAGGTACCT</u> CCTGCTTCTGCTTCCTA        |
| (-514/+103)DRP1  | forward primer: | <u>TAGGTACCC</u> AGGAGAATGGCGTGA          |
| (-244/+103)DRP1  | forward primer: | <u>TAGGTACCT</u> AGCCTTTGACTAGAGC         |
| (-11/+103)DRP1   | forward primer: | <u>TAGGTACC</u> AGGAAGGAGGCGAACT          |
|                  | reverse primer: | <u>GAAGATCT</u> GGAGCTTGTTTATGACA<br>GGAA |

---

## 4. Primers for DRP1 promoter site-directed mutagenesis

|                           |                 |                                       |
|---------------------------|-----------------|---------------------------------------|
| (-961/+103) DRP1 mutation | forward primer: | CCTCCCGGCAGGCCAAAAGCTGCG<br>AGGGAGGTG |
| (-961/+103) DRP1 mutation | reverse primer: | CACCTCCCTCGCAGCTTTTGGCCTG<br>CCGGGAGG |

---

## 5. Primers for CHIP in the DRP1 promoter

|      |                 |                      |
|------|-----------------|----------------------|
| DRP1 | forward primer: | CTCCGCTCCAGAACTACAAC |
|      | reverse primer: | TACCAACAGTACCGGAATGC |

---

## 6. mRNA sequence for shRNA and siRNA sequences

|                   |               |                             |
|-------------------|---------------|-----------------------------|
| shDrp1-1          | mRNA sequence | GCTACTTTACTCCA ACTTATT      |
| shDrp1-2          | mRNA sequence | CGAGATTGTGAGGTTATTGAA       |
| shc-Myc-1         | mRNA sequence | CTGAGACAGATCAGCAACAA        |
| shc-Myc-2         | mRNA sequence | GGAAACGACGAGAACAGTTGA       |
| shctrl            | mRNA sequence | UUCUCCGAACGUGUCACGU         |
| siIkB $\alpha$ -1 |               | 5'-GCUAUUCUCCCUACCA AGCU-3' |

|                   |                             |
|-------------------|-----------------------------|
| siIkB $\alpha$ -2 | 5'-GCUGCCCUAUGAUGACUGU-3'   |
| sictrl            | 5'-UUCUCCGAACGUGUCACGUTT-3' |

### 7. Primers for genotyping

|              |                 |                        |
|--------------|-----------------|------------------------|
| MFN1 (mouse) | forward primer: | AGCAGTTGGTTGTGTGACCA   |
|              | reverse primer: | TTGGTAATCTTTAGCGGTGCTC |
| Cre (mouse)  | forward primer: | TGGCAAACATACGCAAGGG    |
|              | reverse primer: | CGGCAAACGGACAGAAGCA    |

### 8. miRNA mimic and inhibitor

|                  |            |                         |
|------------------|------------|-------------------------|
| miR-373-3p mimic | sense:     | GAAGUGCUUCGAUUUUGGGGUGU |
|                  | antisense: | ACCCCAAAAUCGAAGCACUUCUU |
| control mimic    | sense:     | UUCUCCGAACGUGUCACGUTT   |
|                  | antisense: | ACGUGACACGUUCGGAGAATT   |
| miR-373-3p       | inhibitor: | ACACCCCAAAAUCGAAGCACUUC |
| control          | inhibitor: | CAGUACUUUUGUGUAGUACAA   |

### 9. Primers for mtDNA measurement

|          |                 |                          |
|----------|-----------------|--------------------------|
| ND1      | forward primer: | CTAGCAGAAACAAACCGGGC     |
|          | reverse primer: | CCGGCTGCGTATTCTACGTT     |
| 16S rRNA | forward primer: | CCGCAAGGGAAAGATGAAAGAC   |
|          | reverse primer: | TCGTTTGGTTTCGGGGTTTC     |
| HK2      | forward primer: | GCCAGCCTCTCCTGATTTTAGTGT |
|          | reverse primer: | GGGAACACAAAAGACCTCTTCTGG |

### 10. Sequence of Target Site Blocker

|          |                         |
|----------|-------------------------|
| TSB-MFN1 | TGAAATCTGGTTAAAAGCACTTT |
| TSB-NC   | TAACACGTCTATACGCCCA     |

98 **Table S3. Primary antibodies used for Western blotting and immunohistochemistry**

| <b>Antibody</b>  | <b>Company (Cat. No.)</b>            | <b>Working dilutions</b> |
|------------------|--------------------------------------|--------------------------|
| MFN1             | abcam (ab104585)                     | WB: 1/1000 IHC:1/150     |
| MFN2             | abcam (ab101055)                     | IHC:1/100                |
| DRP1             | abcam (ab56788)                      | WB: 1/1000 IHC: 1/150    |
| FIS1             | abcam (ab156865)                     | IHC: 1/10000             |
| OPA1             | abcam (ab90857)                      | IHC: 1/400               |
| c-Myc            | Proteintech (67447-1-Ig)             | WB: 1/500 IHC: 1/300     |
| c-Myc            | Proteintech (10828-1-AP)             | Chip:1/50                |
| AKT              | Cell Signaling Technology (9272)     | WB: 1/1000               |
| p-AKT            | Cell Signaling Technology (4051)     | WB: 1/600                |
| $\beta$ -actin   | Beijing TDY BIOTECH CO., Ltd.        | WB: 1/3000               |
| NF-kB            | abcam(ab7970)                        | WB: 1/1000               |
| IKB $\alpha$     | abcam(ab76429)                       | WB: 1/1000               |
| LMNB1            | Beijing TDY BIOTECH CO., Ltd.        | WB: 1/2000               |
| p-IKK            | Santa Cruz Biotechnology (C-23470-R) | WB:1/1000                |
| p70S6K           | Cell Signaling Technology (9202)     | WB: 1/1000               |
| p-p70S6K(Thr389) | Cell Signaling Technology (9234)     | WB: 1/1000               |
| PCNA             | abcam (ab18197)                      | IHC:1/15000              |

99

100

101

102

103

104

105

**Table S4. Public datasets used for bioinformatics analyses**

| <b>Accession No.</b> | <b>Platform</b>                                              | <b>HB Sample No.</b> | <b>Patient Ethnicity</b>                              | <b>PMID</b> | <b>Source URL</b>                                                                                                                       |
|----------------------|--------------------------------------------------------------|----------------------|-------------------------------------------------------|-------------|-----------------------------------------------------------------------------------------------------------------------------------------|
| GSE133039            | Illumina<br>HiSeq 2500<br>(Homo sapiens)<br>[HG-U133_Plus_2] | 66                   | -                                                     | 32240714    | <a href="https://www.ncbi.nlm.nih.gov/geo/query/acc.cgi?acc=GSE133039">https://www.ncbi.nlm.nih.gov/geo/query/acc.cgi?acc=GSE133039</a> |
| GSE75271             | Affymetrix<br>Human Genome<br>U133 Plus 2.0<br>Array         | 50                   | Hispanic<br>Caucasian<br>Asian<br>African<br>American | 27775819    | <a href="https://www.ncbi.nlm.nih.gov/geo/query/acc.cgi?acc=GSE75271">https://www.ncbi.nlm.nih.gov/geo/query/acc.cgi?acc=GSE75271</a>   |
