# Supplementary material
Source: PubMed Central journal article supplement (PMC9077476)
Supplement: mmc2.pdf [file mmc2.pdf]

# Mitochondrial fragmentation is crucial for *c-Myc*-driven hepatoblastoma-like liver tumors

Dalin Wang,<sup>1,2,7</sup> Jiming Tian,<sup>3,7</sup> Zeyu Yan,<sup>4</sup> Qing Yuan,<sup>5</sup> Dan Wu,<sup>1</sup> Xiaoli Liu,<sup>1</sup> Shirong Yang,<sup>4</sup> Shanshan Guo,<sup>1</sup> Jianxun Wang,<sup>6</sup> Yongxiu Yang,<sup>3</sup> Jinliang Xing,<sup>1</sup> Jiaze An,<sup>2</sup> and Qichao Huang<sup>1</sup>

<sup>1</sup>State Key Laboratory of Cancer Biology and Department of Physiology and Pathophysiology, Fourth Military Medical University, Xi'an 710032, China; <sup>2</sup>Department of Hepatobiliary Surgery, Xijing Hospital, Fourth Military Medical University, Xi'an 710032, China; <sup>3</sup>The First Clinical Medical College of Lanzhou University, Lanzhou 730099, China; <sup>4</sup>Department of General Surgery, Tangdu Hospital, Fourth Military Medical University, Xi'an 710038, China; <sup>5</sup>Institute of Medical Research, Northwestern Polytechnical University, Xi'an 710072, China; <sup>6</sup>Department of General Surgery, 986th Hospital of Air Force, Xi'an 710054, China

**Hepatoblastoma is the most common liver cancer in children, and the aggressive subtype often has a poor prognosis and lacks effective targeted therapy. Although aggressive hepatoblastoma (HB) is often accompanied by abnormally high expression of the transcription factor *c-Myc*, the underlying mechanism remains unclear. In this study, we found that mitochondrial fragmentation was enhanced by *c-Myc* overexpression in human aggressive HB tissues and was associated with poor prognosis. Then, a mouse model resembling human HB was established via hydrodynamic injection of *c-Myc* plasmids. We observed that liver-specific knockout of the mitochondrial fusion molecule *MFN1* or overexpression of mitochondrial fission molecule *DRP1* promoted the occurrence of *c-Myc*-driven liver cancer. In contrast, when *MFN1* was overexpressed in the liver, tumor formation was delayed. *In vitro* experiments showed that *c-Myc* transcriptionally upregulated the expression of *DRP1* and decreased *MFN1* expression through upregulation of miR-373-3p. Moreover, enhanced mitochondrial fragmentation significantly promoted aerobic glycolysis and the proliferation of HB cells by significantly increasing reactive oxygen species (ROS) production and activating the RAC- $\alpha$  serine/threonine-protein kinase (AKT)/mammalian target of rapamycin (mTOR) and nuclear factor  $\kappa$ B (NF- $\kappa$ B) pathways. Taken together, our results indicate that *c-Myc*-mediated mitochondrial fragmentation promotes the malignant transformation and progression of HB by activating ROS-mediated multi-oncogenic signaling.**

## INTRODUCTION

Hepatoblastoma (HB) is the most common pediatric liver cancer diagnosed in infants and young children (it is extremely rare in adults), which presents unique parenting challenges.<sup>1</sup> The incidence of HB has been increasing worldwide over the last several decades, partially due to the increased survival of infants with low birth weight and of premature infants.<sup>2,3</sup> Although surgery combined with neoadjuvant chemotherapy significantly improves the overall survival rate of patients with HB, approximately 30% of patients still show relatively poor outcomes.<sup>4,5</sup> Therefore, there is an urgent need to explore the underlying mechanism of HB with poor prognosis and pave the way for the development of novel therapeutic strategies.

*c-Myc* serves as a “master regulator” of multiple cellular processes, including proliferation, stemness, and metabolism.<sup>6,7</sup> Previous studies have also shown that *c-Myc* plays a crucial role in HB tumorigenesis.<sup>8–10</sup> Cairo et al. have indicated that the immature subtype HB (C2 subtype) is characterized by specific overexpression of the *c-Myc* gene.<sup>11</sup> Similarly, transcriptomic analysis has further identified a persistently high expression level of *c-Myc* in HB with the poorest prognosis.<sup>12</sup> However, the exact mechanism by which *c-Myc* exhibits oncogenic activity in HB remains poorly understood.

Mitochondria are highly dynamic organelles that constantly fuse and divide.<sup>13</sup> Mitochondrial dynamics are mainly regulated by several molecules, such as dynamin-related protein 1 (*DRP1*), mitofusin 1 (*MFN1*), and *MFN2*, which are frequently deregulated in various human solid malignant neoplasms.<sup>14,15</sup> Chen et al. identified that *MFN1* is a leading downregulated candidate in triple-negative breast cancer and is closely associated with poor prognosis of patients.<sup>16</sup> Lee et al. demonstrated that increased *DRP1* expression indicates poor prognosis in patients with castration-resistant prostate cancer.<sup>17</sup> Furthermore, a growing body of evidence suggests that inhibition of mitochondrial fission prevents the proliferation and metastasis of many types of human cancer cells.<sup>18,19</sup> However, whether deregulation of mitochondrial dynamics is involved in the malignant transformation of normal cells, the most critical step in tumor occurrence, is far from clear.

It is now widely accepted that cancer cells exhibit aberrant redox homeostasis with increased reactive oxygen species (ROS) production.<sup>20,21</sup> Numerous lines of evidence supported that ROS is an

Received 23 June 2021; accepted 20 January 2022;

<https://doi.org/10.1016/j.ymthe.2022.01.032>.

<sup>7</sup>These authors contributed equally

**Correspondence:** Qichao Huang, State Key Laboratory of Cancer Biology and Department of Physiology and Pathophysiology, Fourth Military Medical University, Xi'an 710032, China.

**E-mail:** [huangqichao@fmmu.edu.cn](mailto:huangqichao@fmmu.edu.cn)

**Correspondence:** Jiaze An, Department of Hepatobiliary Surgery, Xijing Hospital, Fourth Military Medical University, Xi'an 710032, China.

**E-mail:** [anchen@fmmu.edu.cn](mailto:anchen@fmmu.edu.cn)

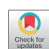

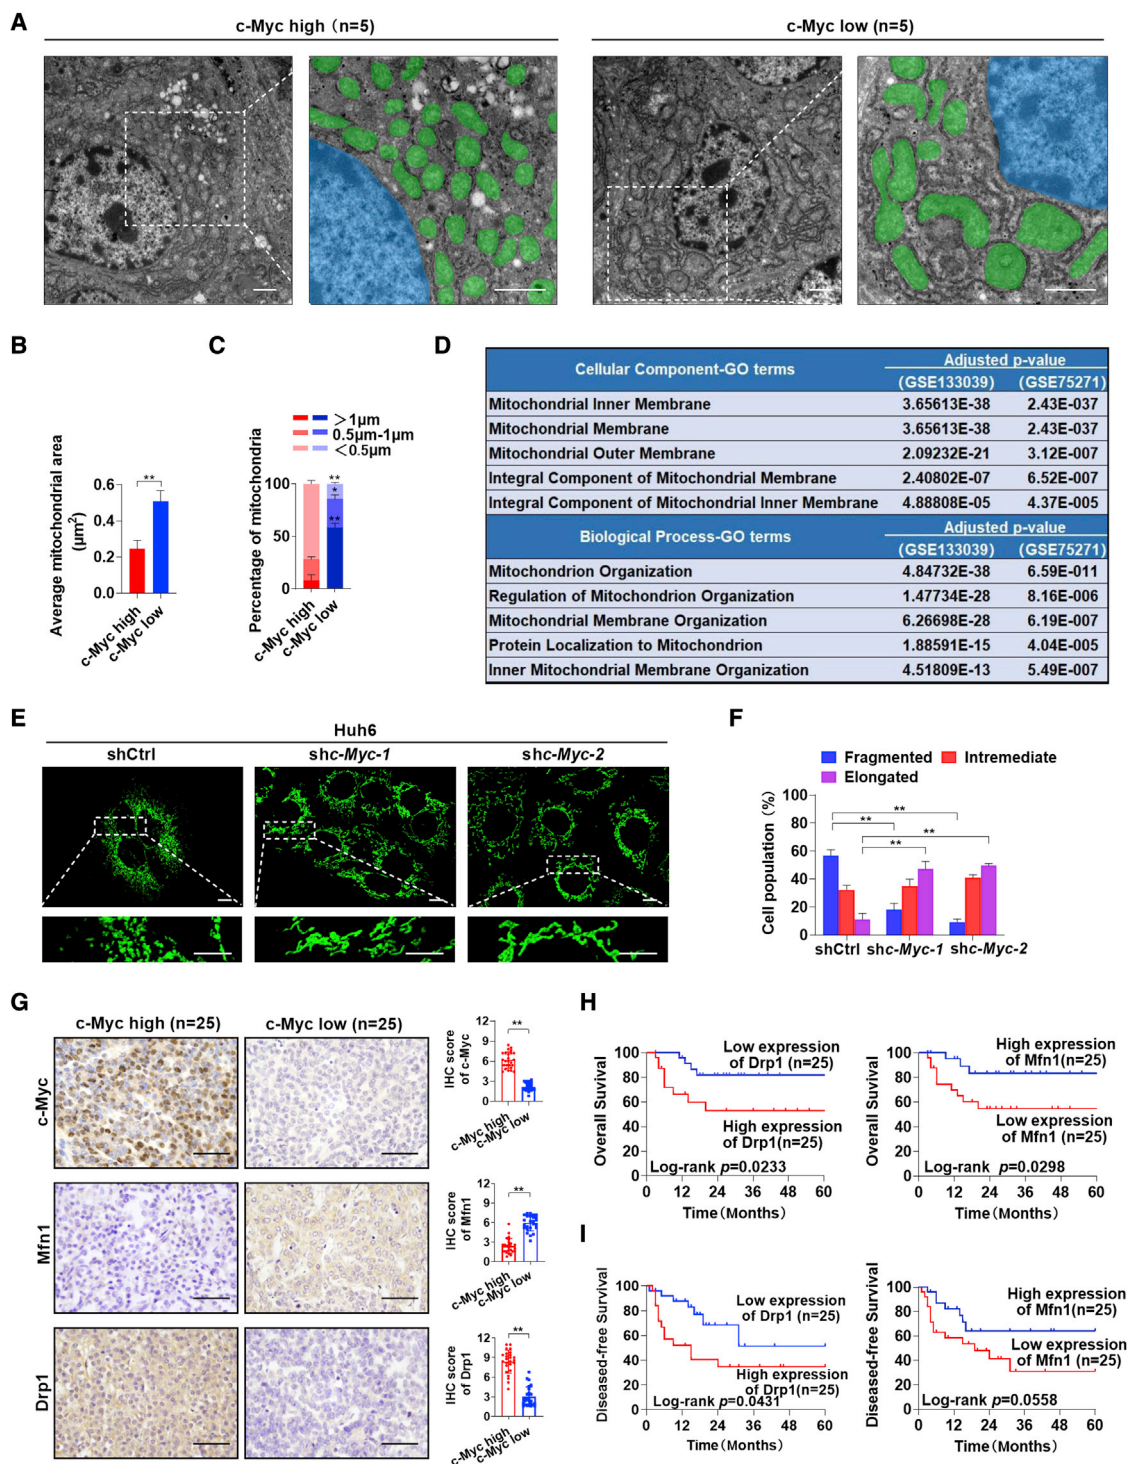

**Figure 1. Mitochondrial fragmentation is induced by c-Myc overexpression in hepatoblastoma and is associated with poor prognosis**

(A) Representative TEM images of mitochondrial morphology in hepatoblastoma (HB) tissues with high (n = 5) or low (n = 5) expression levels of c-Myc. Scale bars: 1  $\mu\text{m}$ . Mitochondria and nucleus were pseudo-colored green and blue. (B and C) The average area (B) and length (C) distributions of mitochondria were analyzed from five random fields (120  $\mu\text{m}^2$ ) approximately equaling the low magnification images of TEM in each group samples. (D) Cellular component terms and biological process terms enriched by the differentially expressed genes between HB tissues with high and low c-Myc expression. (E) Representative confocal microscopy images of mitochondria in Huh6 cells

(legend continued on next page)

important signaling molecule and plays a critical role in both cell proliferation and apoptosis resistance. For example, high levels of ROS in cancer cells promote the activation of many oncogenic signaling pathways, such as phosphatidylinositol 3-kinase-protein kinase B/RAC- $\alpha$  serine/threonine-protein kinase (PI3K-PKB/AKT), nuclear factor  $\kappa$ B (NF- $\kappa$ B), and mitogen-activated protein kinase/extracellular signal-regulated kinase (MAPK/ERK).<sup>21</sup> Importantly, we and others have shown that mitochondrial fragmentation induced by *DRP1* or deletion of *MFN1/2* is associated with increased ROS levels in tumor cells.<sup>22–24</sup> Nevertheless, the roles of mitochondrial fragmentation and ROS in HB tumorigenesis remain to be elucidated.

Here, transmission electron microscopy (TEM) was employed to identify changes in mitochondrial structure in aggressive HB. *MFN1*<sup>fllox/fllox</sup> mice and hydrodynamic injection technology were used to systematically investigate the role of mitochondrial fragmentation in *c-Myc*-driven HB-like liver tumors. We also explored the underlying mechanism *in vitro* using human HB cell lines.

## RESULTS

### Mitochondrial morphology is deregulated in aggressive HB with *c-Myc* overexpression

To identify changes in the cellular or organelle structure in HB with high expression levels of *c-Myc*, human HB tissues were subjected to TEM. As shown in **Figures 1A** and **1B**, mitochondria in HB tissues with high *c-Myc* expression were much smaller than those in HB tissues with low *c-Myc* expression. With respect to the length distribution of mitochondria, the short (<0.5  $\mu$ m) mitochondria were abundant in the *c-Myc* high expression group (**Figure 1C**). Consistently, the mitochondrial population was increased in the *c-Myc* high expression group, while the total area occupied by mitochondria per unit area of 120  $\mu$ m<sup>2</sup> was decreased compared with the *c-Myc* low expression group (**Figures S1A** and **S1B**). These changes indicated the occurrence of mitochondrial fragmentation in HB with a high expression of *c-Myc*. To further confirm this phenomenon, the differentially expressed genes (DEGs) between the *c-Myc* high expression group and the *c-Myc* low expression group were annotated using two public datasets (GEO: GSE133039 and GSE75271). As expected, the DEGs were enriched in the mitochondrial-membrane-organization-related Gene Ontology (GO) terms (**Figure 1D**).

To explore the direct effects of *c-Myc* on mitochondrial morphology, *c-Myc* was knocked down in two HB cell lines, Huh6 and HepG2 (**Figure S1C**), which were reported to express high levels of *c-Myc*.<sup>11,12</sup> Mitotracker Green staining analysis demonstrated that fragmented mitochondria were significantly decreased in HB cells with *c-Myc* knockdown (**Figures 1E**, **1F**, **S1D**, and **S1E**). Immunohistochemical staining analysis in a relatively larger cohort of 50 patients with HB also revealed that the expression of *c-Myc* was negatively associated

with the expression of mitochondrial fusion protein Mfn1 and was positively associated with the mitochondrial fission protein Drp1 in human HB tissues. However, the expression levels of other mitochondrial dynamic regulators (Mfn2, Opa1, and Fis1) were not significantly changed (**Figures 1G** and **S1F**). Consistently, *c-Myc* knockdown significantly decreased Drp1 expression, increased Mfn1 expression, and then inhibited mitochondrial fragmentation and the proliferation of HB cells. Restorative expression of *c-Myc* reversed this effect (**Figures S1G–S1K**). Furthermore, patients with HB with a low expression of Drp1 or a high expression of Mfn1 had a significantly better overall survival and disease-free survival than those with a high expression of Drp1 or a low expression of Mfn1 (**Figures 1H** and **1I**).

### Mitochondrial fragmentation promotes the formation of *c-Myc*-driven HB-like liver tumors *in vivo*

To evaluate whether mitochondrial fragmentation plays a key role in *c-Myc*-driven HB, *MFN1* liver-specific knockout mice (Alb-Cre; *MFN1*<sup>fllox/fllox</sup>; **Figure S2A**) were generated. Two *loxP* recombination sites flank the exon encoding the canonical G-1 GTPase motif. When exposed to Cre recombinase, an excision of this critical exon and a frameshift occurs, thus preventing the formation of a functional protein.<sup>25</sup> Then, the *c-Myc* plasmid along with the Sleeping Beauty (SB) transposon were delivered into mouse hepatocytes by hydrodynamic tail vein injection. Mouse livers were harvested at 4 weeks post-injection, and the deletion of *MFN1* or the overexpression of *DRP1* was confirmed in tumor tissues by immunohistochemistry (IHC) (**Figures S2B** and **S2C**). As shown in **Figures 2A** and **S2D**, Alb-Cre; *MFN1*<sup>fllox/fllox</sup> mice developed much larger tumors than *MFN1*<sup>fllox/fllox</sup> mice. Consistently, the deletion of *MFN1* also resulted in a shorter survival time and a higher liver/body weight ratio (**Figures 2B** and **2C**). Similar results were also observed in wild-type (WT) mice hydrodynamically injected with *c-Myc*, *DRP1* plasmids, and SB transposons when compared with mice injected with *c-Myc*, SB transposons, and pT3 empty vectors as control (**Figures 2A–2C** and **S2D**). Histological analysis revealed that all tumors developed from *c-Myc* injection displayed HB-like characteristics (**Figure 2D**). Moreover, *MFN1* knockout or *DRP1* overexpression elevated the percentage of proliferating cell nuclear antigen (PCNA)<sup>(+)</sup> cells and cells with fragmented mitochondria but decreased the mtDNA content (**Figures 2D–2G** and **S2E**).

Since previous studies have shown that both *c-Myc* and fragmented mitochondria induced a metabolic shift from oxidative phosphorylation to aerobic glycolysis, which thus facilitate tumor progression,<sup>26–28</sup> we then first employed the Seahorse XF Real-Time ATP Rate Assay to evaluate the effect of *c-Myc* on aerobic glycolysis in HB cells (**Figures S2F** and **S2G**). Our data showed that *c-Myc* knockdown significantly decreased the total ATP and glycoATP production

with or without *c-Myc* knockdown. Scale bars: 10  $\mu$ m. shc-*Myc*-1 and shc-*Myc*-2, shRNA against *c-Myc*; shctrl, control shRNA. (F) Morphology distribution of mitochondria was analyzed in Huh6 cells with different treatment as indicated. (G) Representative immunohistochemical (IHC) staining images of *c-Myc*, Mfn1, and Drp1 in HB tissues with high ( $n = 25$ ) and low ( $n = 25$ ) *c-Myc* expression. Scale bar: 50  $\mu$ m. (H and I) Kaplan-Meier curve analysis of overall survival (OS) and disease-free survival (DFS) in HB patients by the expression of Drp1 and Mfn1. Data are expressed as mean  $\pm$  SD. \* $p < 0.05$ , \*\* $p < 0.01$ .

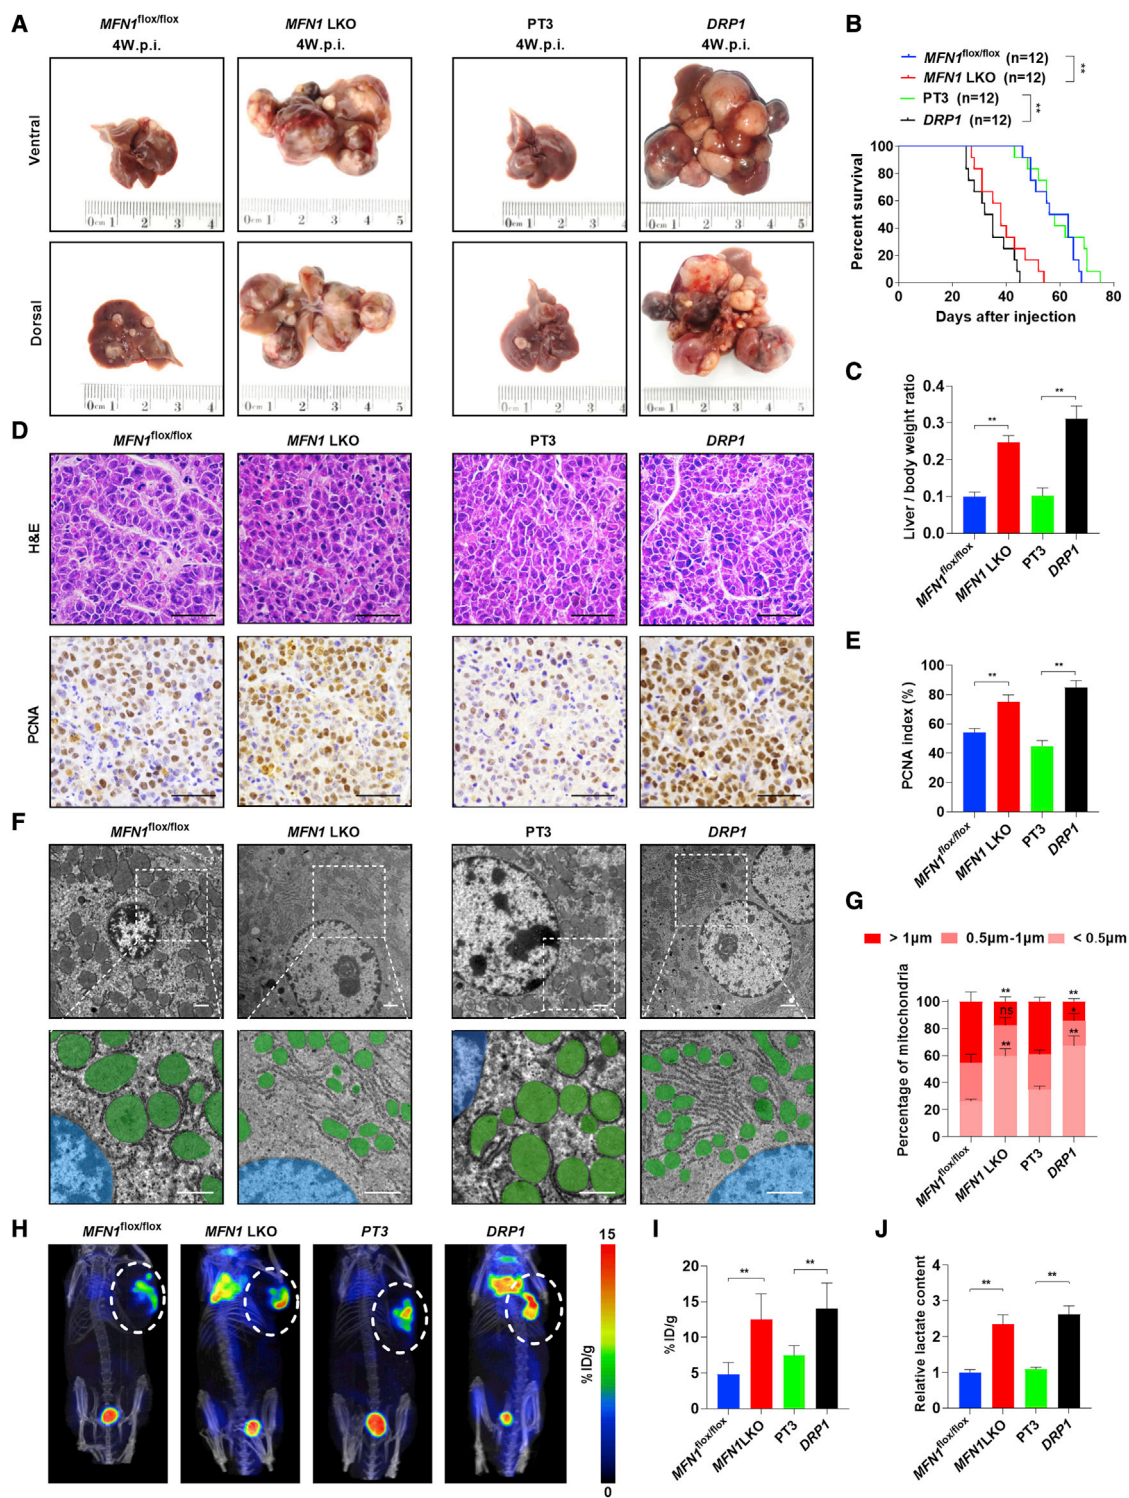

**Figure 2. Mitochondrial fragmentation caused by *MFN1* knockout or *DRP1* overexpression promotes tumorigenesis of *c-Myc*-driven HB in mice**

(A) Representative gross images of livers from *MFN1*<sup>flox/flox</sup> (n = 12) or Alb-Cre; *MFN1*<sup>flox/flox</sup> (n = 12) mice injected with *c-Myc*/SB plasmids (left panel) or from WT mice injected with *c-Myc*/pT3 (n = 12) or *c-Myc*/*DRP1* (n = 12) plasmids (right panel). *MFN1*<sup>flox/flox</sup>, *MFN1*<sup>flox/flox</sup> mice hydrodynamically injected with *c-Myc* plasmid and SB transposon; *MFN1* LKO, *MFN1* liver-specific knockout mice hydrodynamically injected with *c-Myc* plasmid and SB transposon; PT3, wild-type mice hydrodynamically injected with

(legend continued on next page)

rates but promoted mitoATP production rates in HB cells, implying that the aerobic glycolysis was involved in *c-Myc*-driven HB-like liver tumors. Moreover, positron emission tomography (PET) scan analysis demonstrated that the uptake of  $^{18}\text{F}$ -FDG was significantly increased in *MFN1* knockout and *DRP1* overexpression groups when compared with that in the control groups (Figures 2H and 2I). Consistently, lactate levels were also elevated in the *MFN1* knockout and *DRP1* overexpression groups (Figure 2J).

#### Inhibition of mitochondrial fragmentation delays the formation of *c-Myc*-driven HB-like liver tumors *in vivo*

To further verify the hypothesis that mitochondrial fragmentation promotes *c-Myc*-driven HB, we hydrodynamically injected the *MFN1* plasmids together with the *c-Myc* plasmids as well as the SB transposase into the mouse liver. Interestingly, overexpression of *MFN1* significantly delayed tumorigenesis induced by *c-Myc*. Indeed, although all mice injected with pT3/*c-Myc* exhibited visible tumors, *MFN1/c-Myc*-injected mice displayed a nearly normal liver appearance as well as a nearly normal liver/body weight ratio at 4 weeks after injection (Figures 3A, 3C, and S3B). Over the long term (8 weeks after injection), pT3/*c-Myc*-injected mice developed a lethal burden of liver tumors. In contrast, *MFN1/c-Myc*-injected mice exhibited much less tumor burden, a decreased liver/body weight ratio, and prolonged survival time (Figures 3A–3C and S3B). Upon histological analysis, only small tumor nodules were occasionally visible on the liver of *MFN1/c-Myc*-injected mice at 4 weeks after injection (Figure 3D). IHC staining analysis demonstrated that the overexpression of *MFN1* in the tumor lesions significantly inhibited the proliferation of tumor cells, as revealed by PCNA staining (Figures 3D, 3E, and S3A). Additionally, overexpression of *MFN1* obviously inhibited mitochondrial fragmentation and decreased lactate production but increased mtDNA content in *c-Myc*-driven liver tumors (Figures 3F–3H and S3C).

#### Mitochondrial fragmentation promotes cell proliferation in HB *in vitro*

To explore the effects of mitochondrial fragmentation on human HB cell survival, *DRP1* was knocked down and *Mfn1* was overexpressed in Huh6 and HepG2 cells (Figures S4A and S4B). MitoTracker Green staining analysis demonstrated that mitochondria became obviously elongated in both HB cells after *DRP1* knockdown or *MFN1* overexpression when compared with those in control cells (Figures 4A, 4B, S4C, and S4D). 5-ethynyl-2'-deoxyuridine (EdU) incorporation assay revealed that HB cells with *DRP1* knockdown or *MFN1* overexpression showed much less EdU incorporation than the control cells (Figures 4C, 4D, S4G, and S4H). Moreover, *DRP1* knockdown or *MFN1* overexpression in HB cells significantly reduced the size of tumor

spheroids, which is in agreement with the inhibitory effects of mitochondrial fragmentation (Figures 4E, 4F, S4E, and S4F). Next, we evaluated the effects of mitochondrial fragmentation on tumor formation *in vivo* by constructing subcutaneous xenograft tumor models. Our results showed that subcutaneous tumors developed from HB cells with *DRP1* knockdown or *MFN1* overexpression exhibited a significant decrease in growth capacity when compared with control tumors (Figures 4G–4I).

#### Mitochondrial fragmentation activates AKT/mTOR and NF- $\kappa$ B pathways by promoting ROS production in HB cells

Previous studies have demonstrated that mitochondrial fragmentation induces the production of intracellular ROS in human cancer cells, leading to the activation of several key signaling pathways, such as AKT/mammalian target of rapamycin (mTOR) and NF- $\kappa$ B.<sup>29,30</sup> Therefore, we hypothesized that the ROS-mediated AKT/mTOR and NF- $\kappa$ B pathways may be involved in aggressive HB. Flow cytometry analysis demonstrated that *DRP1* knockdown or *MFN1* overexpression significantly reduced ROS production in HB cells with high *c-Myc* expression (Figure 5A). We then investigated whether AKT/mTOR and NF- $\kappa$ B signaling pathways were also affected by inhibiting mitochondrial fragmentation in HB cells. As shown in Figure 5B, *DRP1* knockdown or *MFN1* overexpression significantly decreased the levels of phosphorylated-AKT (p-AKT; Ser473), p-p70S6K (Thr389, a downstream target of mTOR), p-IKK (Ser176/180), nuclear p65, and increased the protein level of I $\kappa$ B- $\alpha$  in Huh6 cells. To further illustrate whether mitochondrial-fragmentation-mediated ROS production is involved in this process,  $\text{H}_2\text{O}_2$  was used to stimulate intracellular ROS levels (Figure 5C). Western blotting analysis demonstrated that  $\text{H}_2\text{O}_2$  treatment significantly increased the levels of p-AKT, p-p70S6K, p-IKK, and nuclear p65 and decreased the protein level of I $\kappa$ B- $\alpha$ . More importantly, the effects of *DRP1* knockdown or *MFN1* overexpression on the AKT/mTOR and NF- $\kappa$ B pathways were significantly reversed by treatment with  $\text{H}_2\text{O}_2$  (Figure 5D).

To determine whether ROS-mediated AKT/mTOR and NF- $\kappa$ B pathways have functional consequences in HB, the Cell Counting Kit-8 (CCK-8) assay was performed (Figure 5E). The data demonstrated that the  $\text{H}_2\text{O}_2$  treatment significantly promoted the proliferation of HB cells with or without mitochondrial fragmentation. Moreover, treatment with the inhibitor of the AKT/mTOR pathway (LY2584702, MK2206, or Torin1) or the inhibitor of the NF- $\kappa$ B pathway (JSH-23) significantly inhibited ROS-stimulated proliferation of HB cells, while knockdown of I $\kappa$ B $\alpha$  promoted the proliferation of HB cells with *DRP1* knockdown or *MFN1* overexpression (Figures 5E and S5C). Meanwhile, glycolysis was also impeded by AKT/mTOR

*c-Myc* plasmid and PT3-EF1 $\alpha$  empty vector, as well as SB transposon; *DRP1*, wild-type mice hydrodynamically injected with *c-Myc* plasmid and PT3-EF1 $\alpha$ -*DRP1* construct, as well as SB transposon; w.p.i., weeks post-injection. (B and C) Survival curve (B) and liver/body weight ratio (C) of the mice with treatment as indicated. (D) Representative images of hematoxylin and eosin (H&E) and PCNA staining in mouse liver tumors. Scale bar: 50  $\mu\text{m}$ . (E) Percentage of PCNA-positive cells in mouse liver tumors. (F and G) Representative TEM images of mitochondria in mouse liver tumors. Scale bars: 1  $\mu\text{m}$ . Mitochondria and nucleus were pseudo-colored green and blue. The length distribution of mitochondria was analyzed. (H and I) Representative  $^{18}\text{F}$ -FDG micro-PET/CT images and analysis in mice. A higher intensity of red color indicates a higher  $^{18}\text{F}$ -FDG uptake. (J) Lactate production was measured in mouse tumor tissues. \* $p < 0.05$ , \*\* $p < 0.01$ .

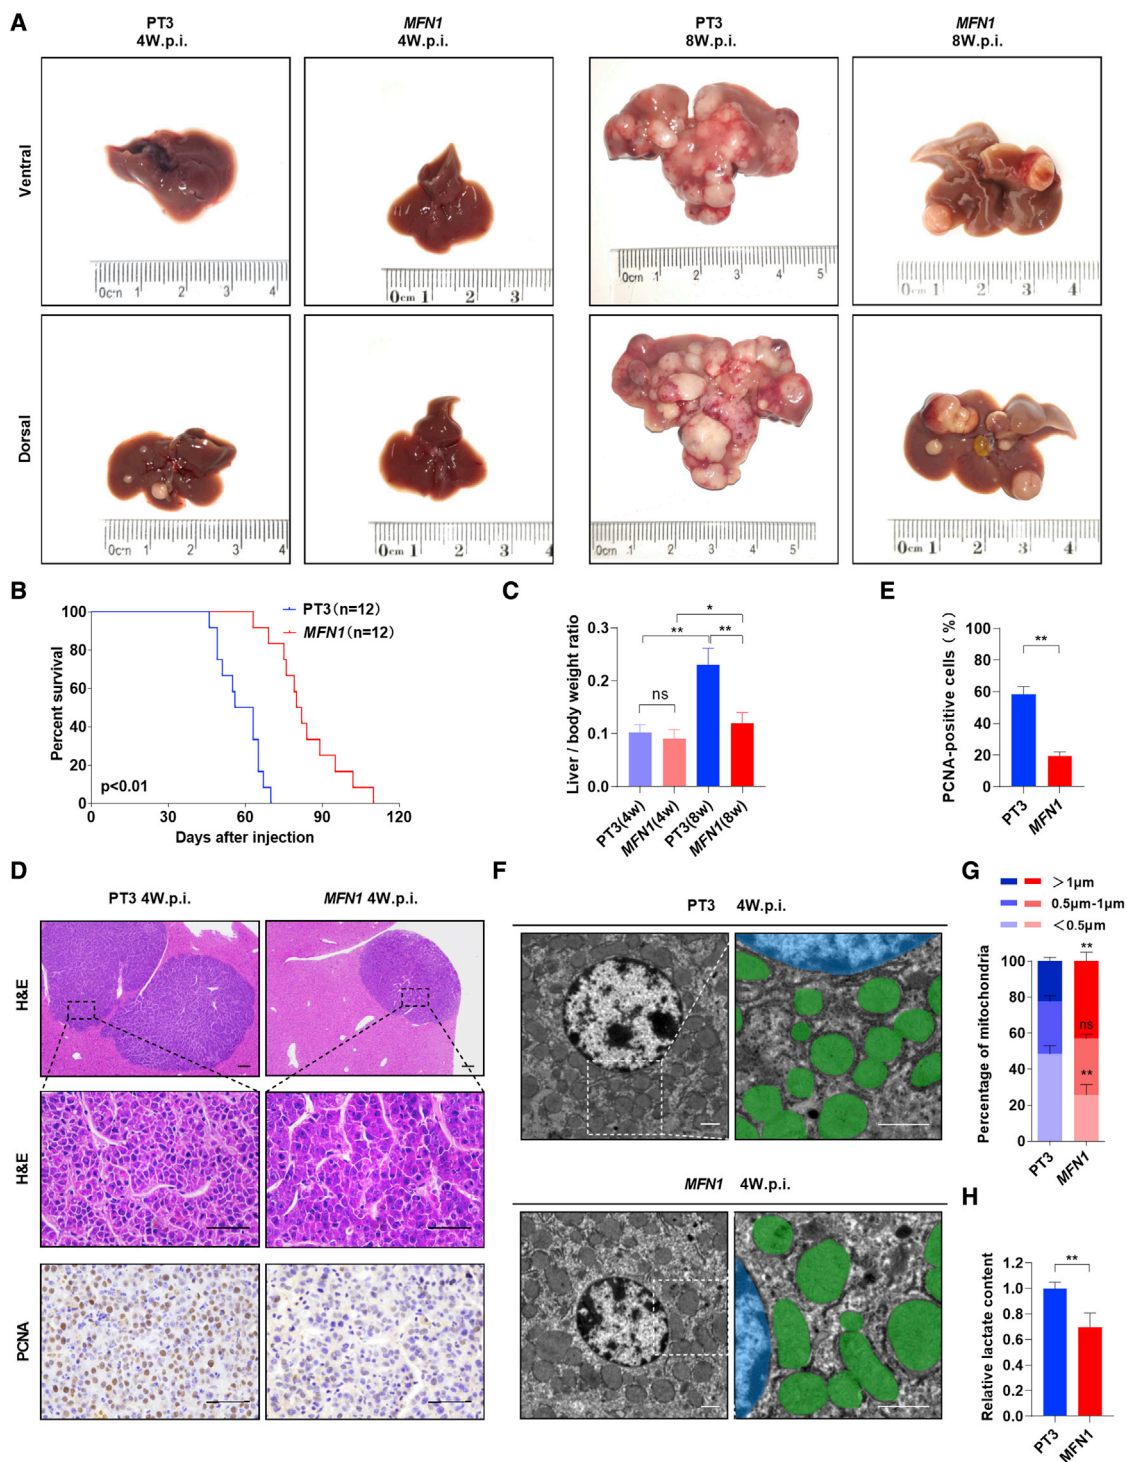

**Figure 3. Inhibition of mitochondrial fragmentation by *MFN1* overexpression delays tumorigenesis of *c-Myc*-driven HB in mice**

(A) Representative gross images of livers from WT mice injected with *c-Myc*/pT3 ( $n = 12$ ) or *c-Myc*/*MFN1* ( $n = 12$ ) plasmids. PT3, wild-type mice hydrodynamically injected with *c-Myc* plasmid and PT3-EF1 $\alpha$  empty vector, as well as SB transposon; *MFN1*, wild-type mice hydrodynamically injected with *c-Myc* plasmid and PT3-EF1 $\alpha$ -*MFN1*

(legend continued on next page)

or NF- $\kappa$ B inhibition in HB cells but was enhanced by H<sub>2</sub>O<sub>2</sub> treatment (Figures S5A and S5B). Taken together, these data indicate that mitochondrial-fragmentation-induced ROS production promotes HB cell proliferation through the AKT/mTOR and NF- $\kappa$ B signaling pathways.

### c-Myc upregulates Drp1 and downregulates Mfn1 through different underlying mechanisms

Recently, chromatin immunoprecipitation sequencing has identified that c-Myc occupies the *DRP1* promoter in lymphoma cells.<sup>31</sup> Therefore, we attempted to confirm this result in HB cells using a luciferase reporter assay. As shown in Figure 6A, c-Myc knockdown significantly reduced the transcriptional activity of the *DRP1* promoter in both Huh6 and HepG2 cells. Moreover, the 233 bp region between -244 and -11 in the promoter region of *DRP1* was identified to be critical for transcriptional regulation by a series of truncated promoter constructs in Huh6 (Figure 6B). Consistently, c-Myc was predicted to bind to this specific region using the Jaspar program, although the canonical E-box was lacking (Figure 6C). Furthermore, site-directed mutagenesis analysis showed that the binding site was crucial for *DRP1* transcription in Huh6 cells (Figure 6D). Additionally, chromatin immunoprecipitation (ChIP) assay further verified that c-Myc specifically bound to the WT *DRP1* promoter, but not the mutant promoter, in Huh6 cells (Figure 6E). These results demonstrate that c-Myc directly binds to the *DRP1* promoter, thus inducing *DRP1* transcription.

Considering that the expression of Mfn1 was decreased in c-Myc-overexpressed HB, we next determined whether microRNAs (miRNAs) were involved in this process. Among the five miRNAs that were predicted to regulate Mfn1 using TargetScan and miRDB databases (Figure 6F), only miR-373-3p was significantly decreased when c-Myc was knocked down (Figure 6G) and was able to repress the expression of Mfn1 in Huh6 cells (Figures S6A and S6D). Moreover, the miR-373-3p inhibitor significantly enhanced the expression of Mfn1 and mitochondrial fusion but decreased the proliferation of Huh6 cells (Figures 6H, 6J, 6L, S6B, and S6C). Similarly, treatment with a target site blocker (TSB), which selectively prevents miR-373-3p binding to the 3' UTR of *MFN1*, blocked the inhibitory effect of the miR-373-3p mimic on Mfn1 expression and mitochondrial fusion and further impeded miR-373-3p-mimic-induced proliferation of HB cells (Figures 6I, 6K, 6M, and S6D). Importantly, our data also demonstrated that the TSB treatment significantly increased the expression of Mfn1 in tumors developed from Huh6 and suppressed tumor growth (Figures 6N-6Q, S6E, and S6F).

## DISCUSSION

In the present study, we aimed to reveal the mechanism underlying the poor prognosis of patients with HB with high levels of c-Myc.

Several key findings have been obtained. First, c-Myc overexpression induced mitochondrial fragmentation by transcriptionally activating *DRP1* and downregulating Mfn1 in an miR-373-3p-dependent manner. Second, mitochondrial fragmentation significantly promoted the tumorigenesis of c-Myc-driven HB-like liver tumors and was associated with the prognosis of patients with HB. Third, mitochondrial fragmentation induced ROS production to promote aerobic glycolysis and the proliferation of HB cells by activating the AKT/mTOR and NF- $\kappa$ B pathways. Our findings suggest that signaling pathways involving ROS may be potential therapeutic targets against aggressive HB.

Previous studies have reported that c-Myc is frequently overexpressed in HB.<sup>32,33</sup> Moreover, it has been reported that c-Myc induced HB-like tumors in mice strikingly resembling the immature subtype of human HB.<sup>11,34</sup> Additionally, c-Myc downregulation in HB cells impairs tumorigenesis *in vivo*.<sup>11</sup> From this point of view, c-Myc appears to be an ideal therapeutic target for HB. However, there is no specific active site of c-Myc for small molecules to target, and it is barely possible to develop therapeutic drugs since c-Myc is mainly located in the nucleus.<sup>35</sup> Therefore, the identification of targetable downstream molecules of c-Myc in HB is warranted.

It is widely accepted that abnormally aggravated mitochondrial fragmentation is a common characteristic of human tumors and is associated with a poor prognosis.<sup>36-39</sup> Similar to our results, previous studies have shown that silencing *DRP1* or the overexpression of *MFN1/2* resulted in a metabolic shift from aerobic glycolysis to oxidative phosphorylation and significantly suppressed the proliferation and metastasis of tumor cells.<sup>40,41</sup> Since aerobic glycolysis (also known as the Warburg effect) is a key metabolic hallmark of tumor cells and facilitates tumor progression, it is reasonable to believe that mitochondrial-fragmentation-induced mitochondrial dysfunction in HB-like liver tumor cells may also enhance the glycolysis and thus promote the survival of tumor cells.

In the present study, we found that overexpression of c-Myc significantly induced mitochondrial fragmentation in HB. Several previous studies have partially supported this finding. For example, HoSeo et al. identified that the mitochondrial fission factor (MFF) is a novel transcriptional target of c-Myc in prostate cancer tissues.<sup>42</sup> Moreover, it has been identified by ChIP sequencing that c-Myc occupies the *DRP1* promoter in lymphoma cells, although the exact binding site has not been reported.<sup>31</sup> Here, we have further shown that the region between -97 and -86 of the *DRP1* promoter is critical for c-Myc binding. miR-373 has been identified as an oncogene in previous studies, as miR-373 promotes the proliferation and tumorigenesis of transformed cells.<sup>43</sup> More importantly, the expression of miR-373-3p was reported to be directly controlled by c-Myc.<sup>44</sup> In the

construct, as well as SB transposon; w.p.i., weeks post-injection. (B and C) Survival curve (B) and liver/body weight ratio (C) of the mice with treatment as indicated. (D) Representative images of H&E and PCNA staining in mouse liver tumors. Scale bar: 50  $\mu$ m. (E) Percentage of PCNA-positive cells in mouse liver tumors. (F) Representative TEM images of mitochondria in mouse liver tumors. Scale bars: 1  $\mu$ m. Mitochondria and nucleus were pseudo-colored green and blue. (G) The length distribution of mitochondria was analyzed. (H) Lactate production was measured in mouse tumor tissues. Data are expressed as the mean  $\pm$  SD. ns, no significant; \*p < 0.05, \*\*p < 0.01.

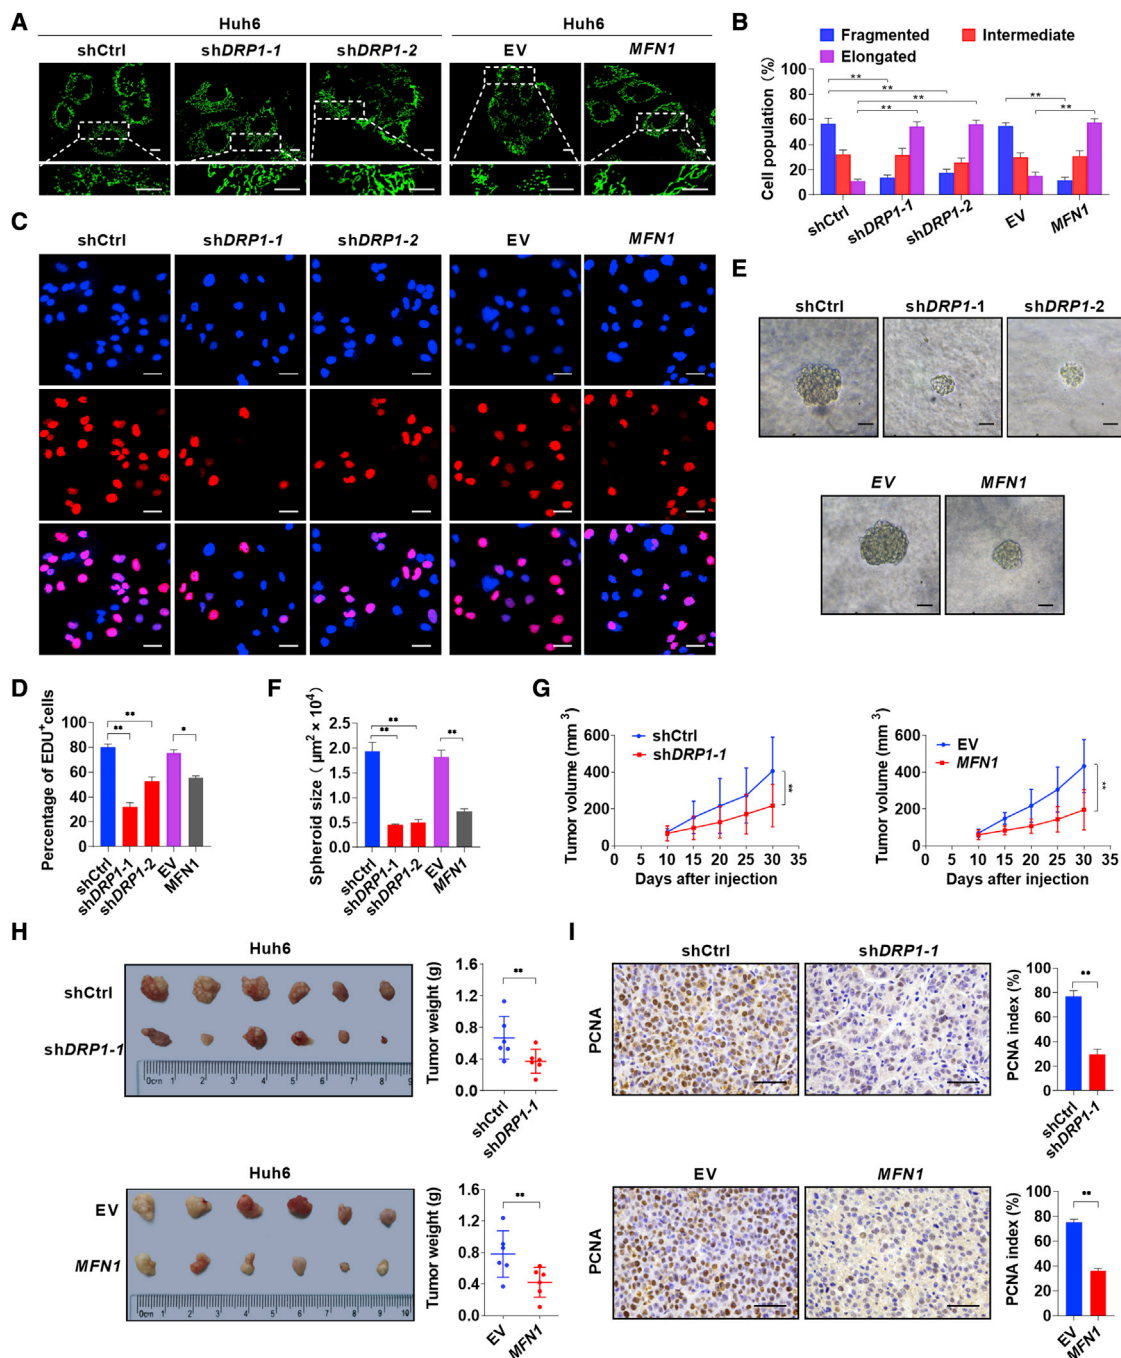

**Figure 4. Increasing mitochondrial fragmentation promotes cell proliferation in HB**

(A) Representative confocal microscopy images of mitochondria in Huh6 cells with treatment as indicated. Scale bars: 10  $\mu\text{m}$ . shctrl, control shRNA; shDRP1-1 and shDRP1-2, shRNA against DRP1; EV, empty vector; MFN1, expression vector encoding MFN1. (B) Morphology distribution of mitochondria was analyzed. (C and D) EdU assay was performed to evaluate proliferation ability of Huh6 cells with treatment as indicated. Scale bar: 50  $\mu\text{m}$ . (E and F) High-magnification images and size of spheres formed on day 7 by Huh6 cells with treatment as indicated. Scale bar: 50  $\mu\text{m}$ . (G) Tumor volume curves of subcutaneous xenograft tumor models developed from Huh6 cells with treatment as indicated. Tumor volume was measured using vernier calipers every 5 days from day 10 after subcutaneous implantation. (H) Images of tumors from sacrificed mice were obtained on day 30 after implantation. Tumor weights of different groups were compared. (I) Representative images of PCNA staining and the percentage of PCNA-positive cells in subcutaneous xenograft tumors. Scale bar: 50  $\mu\text{m}$ . Data are expressed as the mean  $\pm$  SD. \* $p < 0.05$ , \*\* $p < 0.01$ .



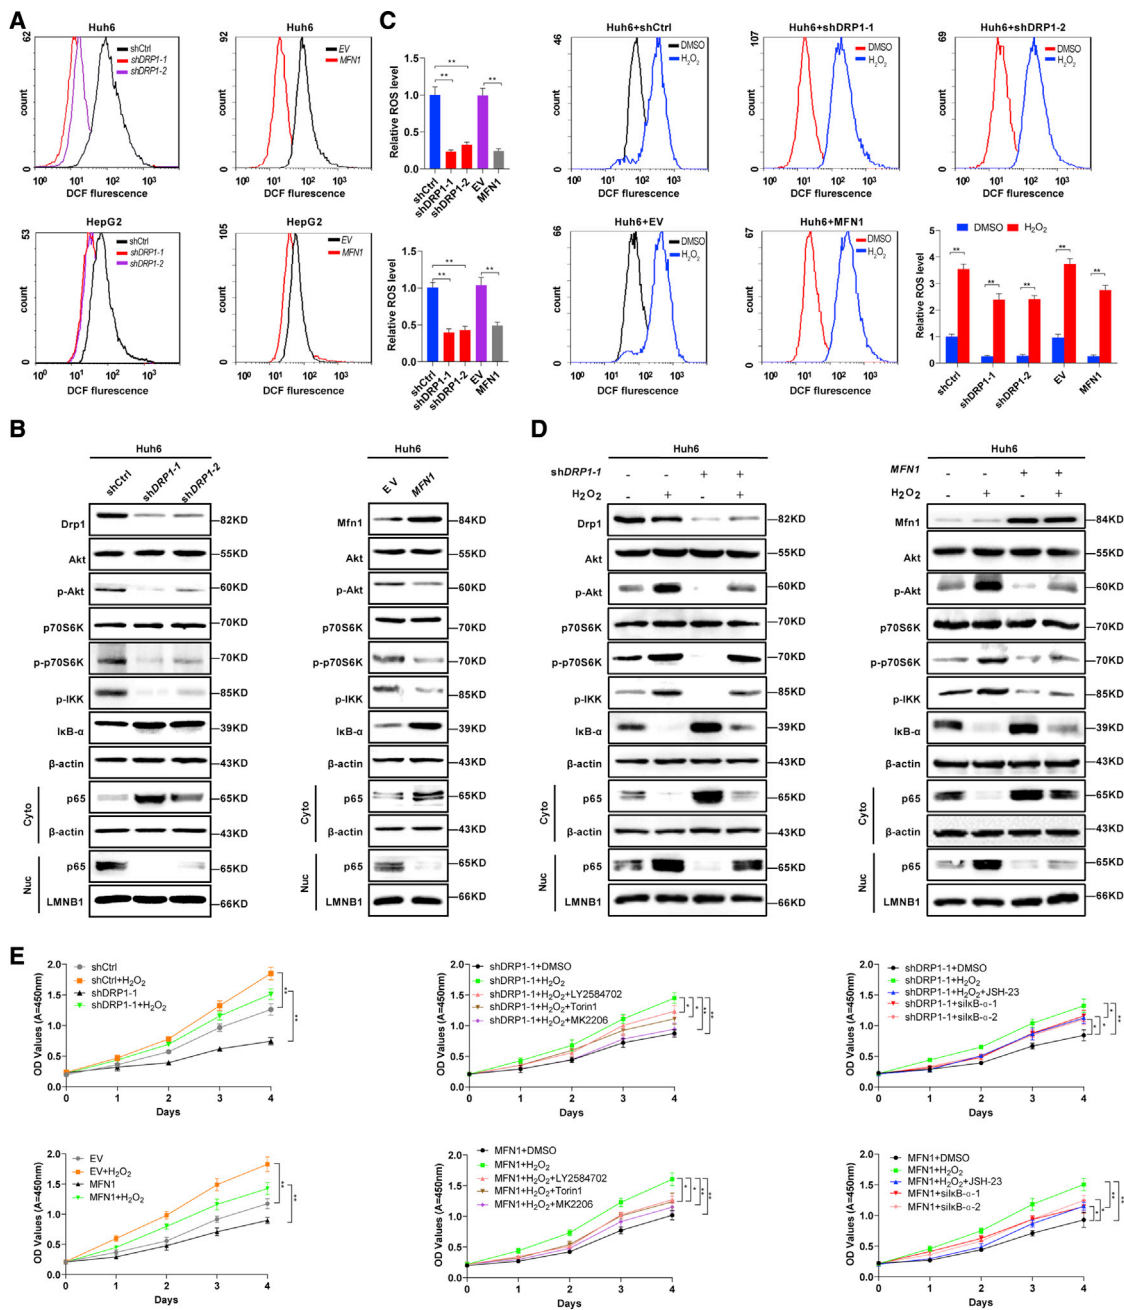

**Figure 5. Mitochondrial fragmentation activates oncogenic signaling in HB cells by production of ROS**

(A) Intracellular ROS production was measured by flow cytometry analysis in Huh6 and HepG2 cells with treatment as indicated. shctrl, control shRNA; *shDRP1-1* and *shDRP1-2*, shRNA against *DRP1*; EV, empty vector; *MFN1*, expression vector encoding *MFN1*. (B) Western blotting images of Drp1, Mfn1, Akt, phosphorylated Akt (p-Akt, Ser473), p70S6K, p-p70S6K (Thr389), p-IKK (Ser176/180), IκB-α, and nuclear and cytosolic p65 in Huh6 cells with treatment as indicated. (C) Intracellular ROS production in Huh6 cells stably transfected with *shDRP1-1*, *shDRP1-2*, or *MFN1* expression vector and then treated with 100 μM H<sub>2</sub>O<sub>2</sub> for 12 h before cell harvest as indicated. (D) Western blotting images of Drp1, Mfn1, Akt, p-Akt (Ser473), p70S6K, p-p70S6K (Thr389), p-IKK (Ser176/180), IκB-α, and nuclear and cytosolic p65 in Huh6 with treatment as indicated. (E) Cell proliferation was analyzed by CCK-8 in Huh6 cells with treatment as indicated. LY2584702, P70S6K (downstream molecule of mTOR) inhibitor; Torin1, mTOR inhibitor; MK2206, Akt inhibitor; JSH-23, NF-κB inhibitor; siIkB-α-1 and siIkB-α-2, siRNA against IκBα. Data are expressed as the mean ± SD. \*p < 0.05, \*\*p < 0.01.

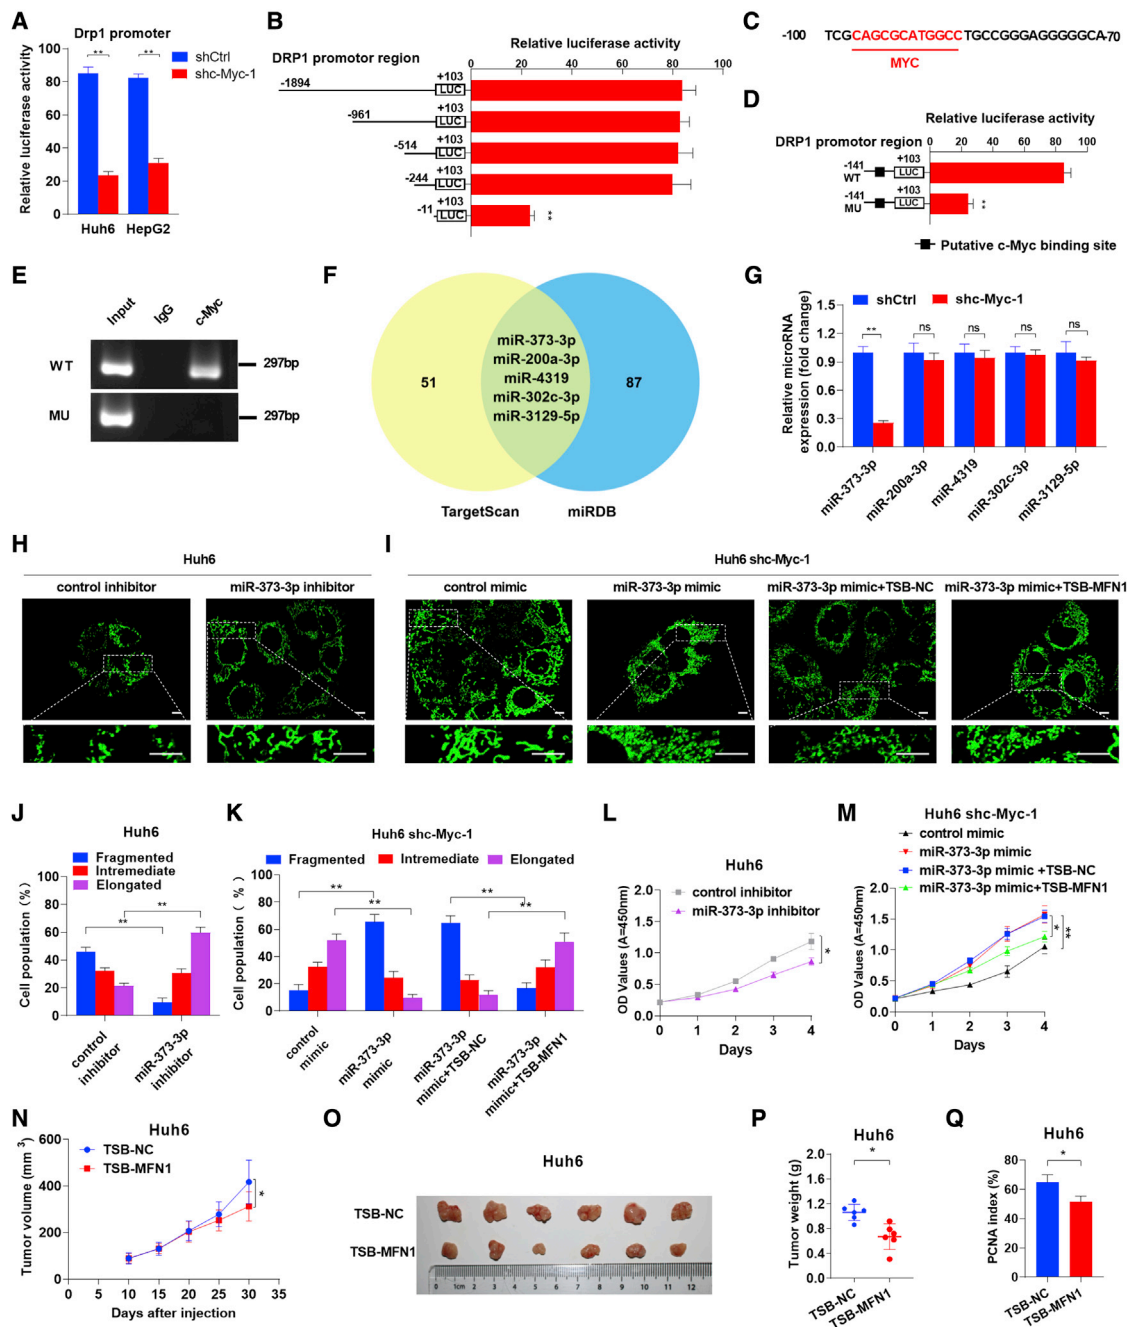

**Figure 6. c-Myc upregulates miR-373-3p to downregulate MFN1 and transcriptionally upregulates Drp1**

(A) Transcriptional activity of the *DRP1* promoter was assessed by luciferase reporter assay in Huh6 cells following *c-Myc* knockdown. shCtrl, control shRNA; shc-Myc, shRNA against *c-Myc*. (B) Transcriptional activities of serially truncated *DRP1* promoter constructs were assessed by luciferase reporter assay in Huh6 cells. (C) The putative binding site for *c-Myc* was predicted by *in silico* analysis. (D) The transcriptional activity of the mutant *DRP1* promoter was assessed using a luciferase reporter assay in Huh6 cells. (E) Plasmid-based ChIP-PCR analyses of *c-Myc* binding to the *DRP1* promoter in Huh6 cells. WT, wild type; MU, mutant. (F) Venn diagram of the predicted miRNAs. Two classic databases were used to screen for miRNAs that could regulate *MFN1*. The yellow region contains 56 miRNAs screened from the TargetScan database, and the blue region contains 92 miRNAs screened from the miRDB database. The green region represents the intersection of the two databases, including five miRNAs with identical predictions. (G) Quantitative real-time reverse-transcription PCR (quantitative real-time RT-PCR) analyses of expression levels of the five predicted miRNAs in Huh6 cells treated as indicated. (H–K) Representative confocal microscopy images and analyses of mitochondrial morphology in Huh6 cells treated as indicated. Scale bars: 10 μm. TSB-NC, negative control of miRNA target site blocker; TSB-MFN1, a target site blocker that selectively prevents miR-373-3p binding to the 3' UTR of *MFN1*. (L and M) Cell

(legend continued on next page)

present study, we uncovered a new function of miR-373 in mediating the expression of Mfn1 and mitochondrial fusion. This seems to explain why miR-373 was previously thought to be a hypoxia-related miRNA,<sup>45</sup> since mitochondrial fusion is inhibited under hypoxia.<sup>46</sup>

A moderately elevated level of ROS has been observed in cancer cells compared with in normal cells.<sup>29</sup> The increase in ROS production contributes to tumorigenesis by sustaining heightened mitogenic signaling, such as the PI3K/AKT and NF- $\kappa$ B signaling cascades.<sup>30</sup> Moreover, approximately 90% of intracellular ROS are generated from the mitochondria. A series of studies have shown that deregulation of mitochondrial fission and fusion significantly influences mitochondrial functions, such as ROS production.<sup>23,47</sup> On the other hand, ROS are also generated as a result of c-Myc activation.<sup>48</sup> One proposed mechanism is the c-Myc-dependent induction of p53, some of which target gene-encoding proteins that regulate ROS.<sup>49</sup> In addition, it has been estimated that approximately half of the ROS generated by c-Myc overexpression in human fibroblasts can be accounted for by the induction of CYP2C9.<sup>49</sup> Our results indicate that mitochondrial fragmentation induced by c-Myc overexpression contributes to ROS production and subsequently promotes cell proliferation by activating the AKT/mTOR and NF- $\kappa$ B pathways. More importantly, these results also indicate that antioxidant reagents are promising choices for the treatment of aggressive HB subtypes.

It is noteworthy that only based on histopathologic assessment, it is not easy to distinguish human hepatocellular carcinoma (HCC) from epithelial HB if no information on the patient's age and gross histomorphology is available.<sup>50,51</sup> Similarly, the pathological type of c-Myc-mediated mouse liver tumors has been controversial in previous studies, indicating that c-Myc-expressing mice developed both HB- and HCC-like tumors.<sup>10,52</sup> In the present study, c-Myc-induced liver tumors were independently examined by two pathologists. Most of them were more like HB but less like HCC. Since c-Myc has been shown to induce the stem-cell-like state to favor the onset of tumorigenesis,<sup>53</sup> we assumed that the different expression levels of c-Myc, different feeding environments, and other unidentified factors may affect the differentiation of tumor cells and thus pathological types (HB or HCC) in different laboratories. Therefore, several potential (but not perfect) biomarkers for the differential diagnosis between HB and HCC may help. Among them,  $\beta$ -catenin was reported to be mainly accumulated in the nucleus of poorly differentiated human HB cells but was localized in the membranous of fetal HB and HCC cells.<sup>54,55</sup> Delta-like 1 homology (*DLK1*) and insulin-like growth factor 2 (*IGF2*) were demonstrated to be uniquely overexpressed in HB tissues.<sup>56,57</sup>

In conclusion, our findings demonstrate that mitochondrial fragmentation is frequently enhanced in c-Myc-overexpressed HB and plays a

critical role in promoting the development of HB by increasing ROS production and subsequently activating the AKT/mTOR and NF- $\kappa$ B signaling pathways. Our findings suggest that targeting aberrant mitochondrial dynamics or particular pathways relevant to ROS may be a promising strategy for the treatment of aggressive HB.

## MATERIALS AND METHODS

### Cell culture and tissue collection

The HB cell lines HepG2 and Huh6 were purchased from the National Collection of Authenticated Cell Cultures (Shanghai, China). Cells were cultured in DMEM (Invitrogen, Carlsbad, CA, USA) supplemented with 10% fetal bovine serum (Sangon Biotech, Shanghai, China) and 1% penicillin-streptomycin (Solarbio, Beijing, China). All HB cell lines were authenticated using short tandem repeat DNA testing at the Fourth Military Medical University (FMMU) Center for DNA Typing. Formalin-fixed paraffin-embedded tissue samples from 50 patients with HB were collected from the Department of Pathology of Xijing Hospital affiliated with the Fourth Military Medical University (FMMU, Xi'an, Shaanxi, China) and Xi'an Children's Hospital (Xi'an, Shaanxi, China). This study was approved by the Ethics Committee of the FMMU. Written informed consent was obtained from all participants. The clinical characteristics of the patients with HB are listed in [Table S1](#). All participants provided written informed consent. This study was approved by the Ethics Committee of the Fourth Military Medical University (permission number: KY20173189-1; date issued: 2017-03-06).

### Experimental animals

*MFN1*<sup>flox/flox</sup> mice with *loxP* sites flanking exon 4 of *MFN1* were generously gifted by Professor Yongzhan Nie (Department of Digestive Diseases, Xijing Hospital, FMMU). Alb-Cre mice were purchased from Shanghai Model Organisms Center (Shanghai, China). Mice with liver-specific knockout of *MFN1* were generated by crossing *MFN1*<sup>flox/flox</sup> mice with Alb-Cre mice under specific pathogen-free (SPF) conditions at the laboratory animal center of FMMU. The animal study was conducted in compliance with the guidelines of the Animal Care Committee of the FMMU. The genotypes of mice were evaluated by multiplex PCR and agarose gel electrophoresis, as previously described.<sup>25</sup> All mice used in this study were euthanized via an overdose inhalation of carbon dioxide in a CO<sub>2</sub> chamber (CO<sub>2</sub> displacement rate equivalent to 20% of the chamber volume/min). All animal experimental procedures were approved by the Animal Care Committee of FMMU (permission number: IACUC-20190902; date issued: 2019-09-01).

### Plasmid construction and cell transfection

Plasmids pT3-EF1 $\alpha$  and pT3-EF1 $\alpha$ -c-Myc and the pCMV/SB transposon were kindly provided by Dr. Xin Chen (University of California, San Francisco, CA, USA). The full-length mouse *DRP1* or *MFN1*

proliferation was analyzed by CCK-8 in Huh6 cells with treatment as indicated. (N) Tumor volume curves of subcutaneous xenograft tumor models developed from Huh6 cells with treatment as indicated. Tumor volume was measured using vernier calipers every 5 days from day 10 after subcutaneous implantation. (O and P) Images of tumors from sacrificed mice were obtained on day 30 after injection. Tumor weights of different groups were compared. (Q) The percentage of PCNA-positive cells in subcutaneous xenograft tumors. Data are expressed as the mean  $\pm$  SD. \* $p < 0.05$ , \*\* $p < 0.01$ .

fragment was amplified from the cDNA of mouse liver and then cloned into the pT3-EF1 $\alpha$  plasmid using the Gateway system (ThermoFisher Scientific, Waltham, MA, USA). For overexpression of *Mfn1* in HB cells, the coding sequence of *MFN1* was amplified from cDNA derived from HepG2 cells using primers containing restriction sites of BamHI and EcoRV and then cloned into the pcDNA 3.1 expression vector. The primers used are shown in Table S2. All plasmids were amplified and purified using the EndoFree Plasmid Maxi kit (TIANGEN, Beijing, China). To generate small hairpin RNA (shRNA) expression vectors, the shRNA containing specific sequences targeting the *c-Myc* or *Drp1* mRNA sequence was cloned into the pSilencer 3.1-H1 *neo* vector (Ambion, Austin, TX, USA). The specific mRNA sequences used are shown in Table S2. The miRNA/miR mimic and inhibitor were synthesized by Shanghai GenePharma (Shanghai, China), and the sequences are listed in Table S2. The TSB was designed, synthesized, and verified by QIAGEN (Hilden, Germany). All transfections were performed using Lipofectamine 2000 reagent (Invitrogen, Carlsbad, CA, USA) according to the manufacturer's protocol. Cell lines stably expressing sh*DRP1*, *MFN1*, or sh*c-Myc* in HepG2 and Huh6 cells were established by G418 (Sigma, St. Louis, MO, USA) treatment after transfection. For the *in vivo* TSB treatment, subcutaneous xenograft tumor models were established using Huh6 cells. Once tumors reached approximately 200 mm<sup>3</sup>, 25 mg/kg<sup>-1</sup> of TSB-*MFN1* or control TSB-NC was subcutaneously injected in the vicinity of the tumors every day.

#### Hydrodynamic transfection

To establish a murine HB tumor model, hydrodynamic injection of plasmid DNA was performed on 6-week-old male C57BL/6J mice as previously described.<sup>58</sup> In brief, 20  $\mu$ g plasmids encoding the gene(s) of interest along with the SB transposase in a ratio of 25:1 were diluted in 2 mL saline for each mouse. The above-mentioned solution was then filtered and injected into the lateral tail vein of mice for 5–7 s.

#### Real-time ATP rate assay

The XF Real-Time ATP Rate Assay kit (Agilent Seahorse Bioscience, North Billerica, MA, USA) was used to measure cell function by kinetic quantification of ATP production, and the data were acquired and analyzed using the Agilent XFe96 Extracellular Flux Analyzer according to the manufacturer's instructions. Briefly, Huh6 cells were seeded at a density of  $1.0 \times 10^4$  cells/well, while HepG2 cells were seeded at a density of  $2.0 \times 10^4$  cells/well. Cells were incubated with DMEM medium overnight. The XFe96 sensor cartridge was hydrated, and the Seahorse XF Calibrant was equilibrated in a non-CO<sub>2</sub> incubator overnight. Prior to the assay, cells were washed twice with pre-warmed Seahorse XF DMEM medium supplemented with 10 mM glucose, 2 mM L-glutamine, and 1 mM pyruvate and then incubated in 180  $\mu$ L medium at 37°C without CO<sub>2</sub> for 60 min. The real-time ATP production rate was measured at 37°C in an XFe96 extracellular flux analyzer, which was previously calibrated using the Seahorse XF Calibrant. During the run, cells received 1.5  $\mu$ M oligomycin (ATP synthase inhibitor) from port A and a mixture of antimycin A and rotenone (0.5  $\mu$ M) from port B to inhibit the activity of

complexes I and III, respectively. Data were collected using Agilent Seahorse Wave 2.6.1 desktop software and exported to GraphPad Prism v.8.3 for analysis.

#### Lactic acid content detection

Lactic acid content was detected using a lactic acid assay kit (Solarbio, Beijing, China) according to the manufacturer's instructions. In brief, 0.1 g tissue or  $5 \times 10^4$  cells in 1 mL extraction reagent I was sonicated on ice. The homogenate was centrifuged at  $12,000 \times g$  for 10 min at 4°C. Supernatant of 0.8 mL was mixed with 0.15 mL extraction reagent II and centrifuged at  $12,000 \times g$  for 10 min at 4°C. The supernatant was collected for detection. The working solution was diluted to standard solutions of different concentrations (2.5, 1.25, 0.625, 0.3125, 0.15625, and 0.078  $\mu$ mol/mL). The absorbance at 570 nm was then measured using a microplate reader (BioTek, New York, NY, USA). The lactic acid content was calculated according to a standard curve, which was depicted based on standard substances. All results were normalized based on the tissue mass or total protein amounts of cells.

#### Glucose uptake detection

Glucose uptake was detected using a glucose assay kit (Solarbio, Beijing, China) according to the manufacturer's instructions. In brief,  $5 \times 10^4$  cells in 1 mL sterile water were sonicated on ice and then heated for 10 min in boiling water. The homogenate was then centrifuged, and the supernatant was collected for detection. The absorbance at 505 nm was measured using a microplate reader (BioTek, New York, NY, USA). Glucose uptake was calculated based on the absorbance of the standard solution. All results were normalized based on the total protein content of cells.

#### Detection of ROS

Cellular ROS was detected using the fluorescent probe DCFH-DA (Beyotime Biotechnology, Shanghai, China) as previously described.<sup>23</sup> Briefly, DCFH-DA was diluted with DMEM to a final concentration of 10  $\mu$ M. HB cells were then resuspended in DCFH-DA solution at  $1 \times 10^5$  cells/mL and incubated for 20 min at 37°C in the dark. Finally, the samples were analyzed using a flow cytometer (Beckman, Fullerton, CA, USA).

#### Mitochondrial imaging by electron microscopy and confocal microscopy

Conventional TEM analysis was performed as previously described.<sup>59</sup> In brief, tumor tissues from HB patients and mouse models were fixed with 4% glutaraldehyde. The samples were post-fixed in OsO<sub>4</sub>, dehydrated in alcohol, and embedded in araldite. Ultrathin sections were stained with uranyl acetate and lead citrate and examined using a Tecnai G2 electron microscope (FEI, Hillsboro, OR, USA) at 8,200 and 16,500 magnifications. The fluorescent dye MitoTracker Green FM (Invitrogen, Carlsbad, CA, USA) was used to monitor mitochondrial morphology with excitation/emission set at 490 and 516 nm in living cells rinsed with serum-free media in a 5% CO<sub>2</sub> and 37°C conditions, as described previously.<sup>59</sup> Then z stack images (with 0.2  $\mu$ m increments) of mitochondria from the cells were taken using a Nikon

A1 plus laser scanning confocal microscope (Nikon, Melville, NY, USA) with a 60 × oil-immersion objective (numerical aperture 1.4) for Huh6 or a 100 × oil-immersion objective (numerical aperture 1.4) for HepG2. For morphometric analysis, the number, length, and area of mitochondria were measured using ImageJ software (NIH, Bethesda, MD, USA) together with a plugin named Mitochondria Analyzer.<sup>60</sup> The mean form factor indicates the mean mitochondrial morphology per cell. The mitochondria are round when the index is 1, and the morphology becomes longer when the index increases. According to the index of the mean form factor, the fragmented form of mitochondria per cell is defined between 1 and 1.5, the intermediate form is defined between 1.5 and 2.5, and the elongated form is defined as greater than 2.5. The number of cells with different forms of mitochondria was counted, and the proportions were calculated.

#### Quantitative RT-PCR, western blotting, IHC, and hematoxylin and eosin

RNA extraction, cDNA synthesis, quantitative RT-PCR (qRT-PCR), and western blotting were performed as previously described.<sup>61</sup> The primer sequences used are shown in Table S2. mtDNA content was evaluated as previously described.<sup>61</sup> Primer sequences are listed in Table S2. The relative mtDNA content was calculated according to the ratio of mtDNA copy number to nuclear DNA copy number. HB tissues were processed for IHC as previously described.<sup>62</sup> The intensity (0, none; 1, faint yellow; 2, yellow; 3, brown) and the proportion of positive cells (0, 0%–9%; 1, 10%–25%; 2, 26%–50%; 3, 51%–75%; 4, 76%–100%) were determined within five random microscopic visual fields per slide by two independent pathologists blinded to the clinical data. IHC staining was scored (0–12) by multiplying the percentage of positive cells by the intensity. The primary antibodies used in this study are listed in Table S3.

#### Collection of public datasets and bioinformatic analysis

Two public datasets of mRNA expression data derived from HB tissues (GEO: GSE133039<sup>63</sup> and GSE75271<sup>64</sup>) were downloaded from the Gene Expression Omnibus database (Table S4) and analyzed. HB patients were ranked according to the expression level of *c-Myc* in each cohort. Patients in the top 25% and bottom 25% were defined as *c-Myc*-high and *c-Myc*-low, respectively. DEGs between the two groups were calculated using an independent shrinkage *t* test. An unweighted gene set enrichment analysis was performed using the GeneTrail 3.0 web service.<sup>65</sup>

#### Cell proliferation assay

Cell proliferation was quantified using the CCK-8 (Beyotime, Shanghai, China) and EdU incorporation assays. For the CCK-8 assay, HB cells were seeded in a 96-well plate and incubated at 37 °C. CCK-8 solution (10 μL) was added to each well, followed by incubation at 37 °C for 2 h. Absorbance at 450 nm was measured using a microplate reader (BioTek, New York, NY, USA). The EdU incorporation assay (Ribobio, Guangzhou, China) was performed as previously described.<sup>66</sup> The results were evaluated using a fluorescent microscope (Olympus, Tokyo, Japan).

#### Tumor spheroid cell culture

One hundred microliters of 10% Matrigel Matrix (BD Biosciences, San Jose, CA, USA) was added to a well of a 96-well chamber slide and allowed to solidify in a cell incubator for about 8 h. Then, 2,000 HB cells suspended in 0.1 mL 2% matrix diluted complete DMEM containing epidermal growth factor (EGF; 20 ng/mL), basic fibroblast growth factor (bFGF; 10 ng/mL), and B27 (1:50) were seeded and cultured at 37 °C for about 1 week. Images of the cell spheroids per group were captured using a fluorescent microscope.

#### Subcutaneous tumor models

For the xenograft models, male BALB/c nude mice (4–6 weeks old) were randomly divided into two groups. For the development of tumor xenografts in nude mice,  $1 \times 10^7$  Huh6 cells treated as indicated were injected into the flanks of nude mice ( $n = 6$  in each group). Tumor length (L) and width (W) were measured using a Vernier caliper every 5 days, and tumor volume was calculated according to the formula  $(L \times W^2)/2$ . The transplanted mice were sacrificed 30 days later. Tumor nodules were photographed and weighed. It should be noted that the maximum tumor diameter was allowed to be within 1.5 cm, and the maximum tumor volume was allowed to be within 2,000 mm<sup>3</sup>.

#### <sup>18</sup>F-FDG micro-PET/CT imaging

Since tumors generated by hydrodynamic transfection often showed multiple nodules of varying sizes *in vivo*, xenograft models were also generated to perform a PET scan with <sup>18</sup>F-FDG. Moreover, to avoid the influence of different tumor volumes on the uptake of <sup>18</sup>F-FDG, varying amounts of tumor tissue mass (20–50 mg) induced by *c-Myc* hydrodynamic transfection were used to establish the xenograft models by subcutaneous implantation. Then, mice with comparable tumor volumes (approximately 1,500 mm<sup>3</sup>) were chosen to fast overnight and were then injected with approximately 3.7 MBq (100 μCi) of <sup>18</sup>F-FDG through the tail vein. The scanning was started 60 min after tracer injection before the mice were anesthetized with 1.5%–2.5% isoflurane using a micro-PET/CT scanner (Mediso Medical Imaging Systems, Budapest, Hungary). All PET/CT images were processed and analyzed using Interview Fusion 1.0 (Mediso Medical Imaging Systems, Budapest, Hungary) software. For semiquantitative analysis, 3-dimensional regions of interest were carefully depicted and manually adjusted over the borders of the tumor. Mean <sup>18</sup>F-FDG uptake was presented as % ID/g (percentage of injected dose per gram of tissue), which was calculated by dividing the tumor radioactivity by the injected dose. and compared between the different interventions.

#### miRNA target prediction

The miRNAs targeting *MFN1* were predicted using the TargetScan<sup>67</sup> and miRDB<sup>68</sup> databases. Venn diagrams were constructed to illustrate overlapping candidate miRNAs from the two databases.

#### Luciferase reporter assay

Luciferase reporter constructs were prepared by cloning the *DRP1* promoter region from the genomic DNA of HB cells into the pGL3-basic luciferase reporter vector (Promega, Madison, WI,

USA). The constructs were transfected into Huh6 cells along with a plasmid containing the Renilla luciferase reporter gene, as previously described.<sup>66</sup> Then, HB cells were lysed and analyzed using the Dual Luciferase Reporter Assay kit (Promega, Madison, WI, USA) according to the manufacturer's instructions. The firefly luciferase activity for a specific promoter construct was normalized to the Renilla luciferase activity. The relative light units were measured using a microplate reader (BioTek, New York, NY, USA).

### Serially truncation and site-directed mutagenesis

Promoter sequences of *DRP1* were obtained from the UCSC Genome Browser. Truncated regions of the *DRP1* promoter were amplified and inserted into the pGL3-basic vector. Site-directed mutagenesis was performed using the QuikChange II Site-Directed Mutagenesis Kit (Agilent, Santa Clara, CA, USA) according to the manufacturer's instructions. The E-box was mutated (underlined) to CAAAAG (WT, CATGCG). The primers used for site-directed mutagenesis of the *DRP1* promoter are listed in Table S2.

### ChIP-PCR analysis

The ChIP assay was performed using an EZ-ChIP kit (Millipore Corporation, Billerica, MA, USA) according to the manufacturer's instructions. Briefly, anti-c-Myc antibody or isotype immunoglobulin G (IgG) was immunoprecipitated with chromatin of Huh6 cells transfected with the WT *DRP1* reporter or the site-mutated (MU) *DRP1* reporter. A product of 297 bp from the regulatory region of *DRP1* was generated by PCR. Primer sequences are provided in Table S2.

### Statistical analyses

The experiments were repeated three times, where appropriate. GraphPad Prism 8.3.0 software (GraphPad Software, La Jolla, CA, USA) was used for all statistical analyses, and  $p < 0.05$  was considered significant. Unpaired t tests were used for comparisons between the two groups, where appropriate. Correlations between measured variables were tested using Spearman's rank correlation analyses.

### SUPPLEMENTAL INFORMATION

Supplemental information can be found online at <https://doi.org/10.1016/j.ymthe.2022.01.032>.

### ACKNOWLEDGMENTS

The authors thank Prof. Xin Chen (University of California, San Francisco) for the generous gift of plasmids PT3-EF1 $\alpha$  and pT3-EF1 $\alpha$ -c-Myc and the pCMV/SB transposon. The authors thank Prof. Yongzhan Nie (Xijing Hospital, Fourth Military Medical University, Xi'an, China) for the generous gift of *MFN1*<sup>fllox/fllox</sup>. The authors are grateful to Prof. Zengshan Li (Xijing Hospital, Fourth Military Medical University, Xi'an, China) and Prof. Guangsheng Chen (Xian Children's Hospital, Xi'an, China) for histological analyses. We also thank the participants who generously participated in this study. This work was supported by grants from the National Natural Science Foundation of China (nos. 82172919, 81772935, 81972590, 81773177, and 82020108023) and the State Key Laboratory of Cancer Biology Project (CBSKL2019ZZ26 and CBSKL2019ZZ06).

### AUTHOR CONTRIBUTIONS

All authors of this paper have directly participated in the planning, execution, or analyses of the study. D.W. and J.T. were involved in the acquisition, analyses, and interpretation of the data and the drafting of the manuscript. Q.Y. and S.G. were involved in bioinformatics analyses. Z.Y., D.W., and X.L. were involved in the analyses and interpretation of data. S.Y. was involved in tissue sample collection. J.W. was involved in <sup>18</sup>F-FDG micro-PET/CT imaging. Y.Y. and J.X. were involved in securing research funding and acquiring, analyzing, and interpreting the data. J.A. and Q.H. were involved in the conception and design of the study, critically revised the manuscript, and supervised the overall study. All authors read and approved the final manuscript.

### DECLARATION OF INTEREST

The authors declare no competing interests.

### REFERENCES

- Rougemont, A.-L., McLin, V.A., Toso, C., and Wildhaber, B.E. (2012). Adult hepatoblastoma: learning from children. *J. Hepatol.* 56, 1392–1403.
- Hubbard, A.K., Spector, L.G., Fortuna, G., Marcotte, E.L., and Poynter, J.N. (2019). Trends in international incidence of pediatric cancers in children under 5 Years of age: 1988–2012. *JNCI Cancer Spectr.* 3, pkz007.
- Heck, J.E., Lee, P.-C., Wu, C.-K., Tsai, H.-Y., Ritz, B., Arah, O.A., and Li, C.-Y. (2020). Gestational risk factors and childhood cancers: a cohort study in Taiwan. *Int. J. Cancer* 147, 1343–1353.
- Aronson, D.C., Weeda, V.B., Maibach, R., Czauderna, P., Dall'Igna, P., de Ville de Goyet, J., Branchereau, S., Perilongo, G., Brock, P., Zsiros, J., et al. (2019). Microscopically positive resection margin after hepatoblastoma resection: what is the impact on prognosis? A Childhood Liver Tumours Strategy Group (SIOPEL) report. *Eur. J. Cancer* 106, 126–132.
- Meyers, R.L., Maibach, R., Hiyama, E., Häberle, B., Krailo, M., Rangaswami, A., Aronson, D.C., Malogolowkin, M.H., Perilongo, G., von Schweinitz, D., et al. (2017). Risk-stratified staging in paediatric hepatoblastoma: a unified analysis from the Children's Hepatic tumors International Collaboration. *Lancet Oncol.* 18, 122–131.
- Baluapuri, A., Wolf, E., and Eilers, M. (2020). Target gene-independent functions of MYC oncoproteins. *Nat. Rev. Mol. Cell Biol.* 21, 255–267.
- Gabay, M., Li, Y., and Felsner, D.W. (2014). MYC activation is a hallmark of cancer initiation and maintenance. *Cold Spring Harb. Perspect. Med.* 4, a014241.
- Shachaf, C.M., Kopelman, A.M., Arvanitis, C., Karlsson, A., Beer, S., Mandl, S., Bachmann, M.H., Borowsky, A.D., Ruebner, B., Cardiff, R.D., et al. (2004). MYC inactivation uncovers pluripotent differentiation and tumour dormancy in hepatocellular cancer. *Nature* 431, 1112–1117.
- Chow, E.K.-H., Fan, L.-L., Chen, X., and Bishop, J.M. (2012). Oncogene-specific formation of chemoresistant murine hepatic cancer stem cells. *Hepatology* 56, 1331–1341.
- Kress, T.R., Pellanda, P., Pellegrinet, L., Bianchi, V., Nicoli, P., Doni, M., Recordati, C., Bianchi, S., Rotta, L., Capra, T., et al. (2016). Identification of MYC-dependent transcriptional programs in oncogene-addicted liver tumors. *Cancer Res.* 76, 3463–3472.
- Cairo, S., Armengol, C., De Reyniès, A., Wei, Y., Thomas, E., Renard, C.-A., Goga, A., Balakrishnan, A., Semeraro, M., Gresh, L., et al. (2008). Hepatic stem-like phenotype and interplay of Wnt/beta-catenin and Myc signaling in aggressive childhood liver cancer. *Cancer Cell* 14, 471–484.
- Hooks, K.B., Audoux, J., Fazli, H., Lesjan, S., Ernault, T., Dugot-Senat, N., Leste-Lasserre, T., Hagedorn, M., Rousseau, B., Danet, C., et al. (2018). New insights into diagnosis and therapeutic options for proliferative hepatoblastoma. *Hepatology* 68, 89–102.

13. Archer, S.L. (2013). Mitochondrial dynamics—mitochondrial fission and fusion in human diseases. *N. Engl. J. Med.* 369, 2236–2251.
14. Tilokani, L., Nagashima, S., Paupe, V., and Prudent, J. (2018). Mitochondrial dynamics: overview of molecular mechanisms. *Essays Biochem.* 62, 341–360.
15. Maycotte, P., Marín-Hernández, A., Goyri-Aguirre, M., Anaya-Ruiz, M., Reyes-Leyva, J., and Cortés-Hernández, P. (2017). Mitochondrial dynamics and cancer. *Tumour Biol.* 39, 1010428317698391.
16. Chen, L., Zhang, J., Lyu, Z., Chen, Y., Ji, X., Cao, H., Jin, M., Zhu, J., Yang, J., Ling, R., et al. (2018). Positive feedback loop between mitochondrial fission and Notch signaling promotes survivin-mediated survival of TNBC cells. *Cell Death Dis.* 9, 1050.
17. Lee, Y.G., Nam, Y., Shin, K.J., Yoon, S., Park, W.S., Joung, J.Y., Seo, J.K., Jang, J., Lee, S., Nam, D., et al. (2020). Androgen-induced expression of DRP1 regulates mitochondrial metabolic reprogramming in prostate cancer. *Cancer Lett.* 471, 72–87.
18. Ma, J.T., Zhang, X.Y., Cao, R., Sun, L., Jing, W., Zhao, J.Z., Zhang, S.L., Huang, L.T., and Han, C.B. (2019). Effects of dynamin-related protein 1 regulated mitochondrial dynamic changes on invasion and metastasis of lung cancer cells. *J. Cancer* 10, 4045–4053.
19. Yi, T., Luo, H., Qin, F., Jiang, Q., He, S., Wang, T., Su, J., Song, S., Qin, X., Qin, Y., et al. (2020). LncRNA LL22NC03-N14H11.1 promoted hepatocellular carcinoma progression through activating MAPK pathway to induce mitochondrial fission. *Cell Death Dis.* 11, 832.
20. Hayes, J.D., Dinkova-Kostova, A.T., and Tew, K.D. (2020). Oxidative stress in cancer. *Cancer Cell* 38, 167–197.
21. Sabharwal, S.S., and Schumacker, P.T. (2014). Mitochondrial ROS in cancer: initiators, amplifiers or an Achilles' heel? *Nat. Rev. Cancer* 14, 709–721.
22. Prieto, J., León, M., Ponsoda, X., Sendra, R., Bort, R., Ferrer-Lorente, R., Raya, A., López-García, C., and Torres, J. (2016). Early ERK1/2 activation promotes DRP1-dependent mitochondrial fission necessary for cell reprogramming. *Nat. Commun.* 7, 11124.
23. Huang, Q., Zhan, L., Cao, H., Li, J., Lyu, Y., Guo, X., Zhang, J., Ji, L., Ren, T., An, J., et al. (2016). Increased mitochondrial fission promotes autophagy and hepatocellular carcinoma cell survival through the ROS-modulated coordinated regulation of the NFKB and TP53 pathways. *Autophagy* 12, 999–1014.
24. Huang, Q., Cao, H., Zhan, L., Sun, X., Wang, G., Li, J., Guo, X., Ren, T., Wang, Z., Lyu, Y., et al. (2017). Mitochondrial fission forms a positive feedback loop with cytosolic calcium signaling pathway to promote autophagy in hepatocellular carcinoma cells. *Cancer Lett.* 403, 108–118.
25. Chen, H., McCaffery, J.M., and Chan, D.C. (2007). Mitochondrial fusion protects against neurodegeneration in the cerebellum. *Cell* 130, 548–562.
26. Ganapathy-Kanniappan, S. (2018). Molecular intricacies of aerobic glycolysis in cancer: current insights into the classic metabolic phenotype. *Crit. Rev. Biochem. Mol. Biol.* 53, 667–682.
27. Feng, J., Li, J., Wu, L., Yu, Q., Ji, J., Wu, J., Dai, W., and Guo, C. (2020). Emerging roles and the regulation of aerobic glycolysis in hepatocellular carcinoma. *J. Exp. Clin. Cancer Res.* 39, 126.
28. Chen, H., and Chan, D.C. (2017). Mitochondrial dynamics in regulating the unique phenotypes of cancer and stem cells. *Cell Metab.* 26, 39–48.
29. Gogvadze, V., Orrenius, S., and Zhivotovskiy, B. (2008). Mitochondria in cancer cells: what is so special about them? *Trends Cell Biol.* 18, 165–173.
30. Moloney, J.N., and Cotter, T.G. (2018). ROS signalling in the biology of cancer. *Semin. Cel. Dev. Biol.* 80, 50–64.
31. Agarwal, E., Altman, B.J., Ho Seo, J., Bertolini, I., Ghosh, J.C., Kaur, A., Kossenkov, A.V., Languino, L.R., Gabrilovich, D.I., Speicher, D.W., et al. (2019). Myc regulation of a mitochondrial trafficking network mediates tumor cell invasion and metastasis. *Mol. Cell Biol.* 39, e00109–19.
32. Comerford, S.A., Hinnant, E.A., Chen, Y., Bansal, H., Klapproth, S., Rakheja, D., Finegold, M.J., Lopez-Terrada, D., O'Donnell, K.A., Tomlinson, G.E., and Hammer, R.E. (2016). Hepatoblastoma modeling in mice places Nrf2 within a cancer field established by mutant -catenin. *JCI Insight* 1, e88549.
33. Fujita, N., Hayashi-Nishino, M., Fukumoto, H., Omori, H., Yamamoto, A., Noda, T., and Yoshimori, T. (2008). An Atg4B mutant hampers the lipidation of LC3 paralogs and causes defects in autophagosome closure. *Mol. Biol. Cell* 19, 4651–4659.
34. Goga, A., Yang, D., Tward, A.D., Morgan, D.O., and Bishop, J.M. (2007). Inhibition of CDK1 as a potential therapy for tumors over-expressing MYC. *Nat. Med.* 13, 820–827.
35. Chen, H., Liu, H., and Qing, G. (2018). Targeting oncogenic Myc as a strategy for cancer treatment. *Signal Transduct. Target. Ther.* 3, 5.
36. Shi, L., Liu, J., Peng, Y., Zhang, J., Dai, X., Zhang, S., Wang, Y., Liu, J., and Long, J. (2020). Deubiquitinase OTUD6A promotes proliferation of cancer cells via regulating Drp1 stability and mitochondrial fission. *Mol. Oncol.* 14, 3169–3183.
37. Liang, J., Yang, Y., Bai, L., Li, F., and Li, E. (2020). DRP1 upregulation promotes pancreatic cancer growth and metastasis through increased aerobic glycolysis. *J. Gastroenterol. Hepatol.* 35, 885–895.
38. Gao, T., Zhang, X., Zhao, J., Zhou, F., Wang, Y., Zhao, Z., Xing, J., Chen, B., Li, J., and Liu, S. (2020). SIK2 promotes reprogramming of glucose metabolism through PI3K/AKT/HIF-1 $\alpha$  pathway and Drp1-mediated mitochondrial fission in ovarian cancer. *Cancer Lett.* 469, 89–101.
39. Rodrigues, T., and Ferraz, L.S. (2020). Therapeutic potential of targeting mitochondrial dynamics in cancer. *Biochem. Pharmacol.* 182, 114282.
40. Zhang, Z., Li, T.E., Chen, M., Xu, D., Zhu, Y., Hu, B.Y., Lin, Z.F., Pan, J.J., Wang, X., Wu, C., et al. (2020). MFN1-dependent alteration of mitochondrial dynamics drives hepatocellular carcinoma metastasis by glucose metabolic reprogramming. *Br. J. Cancer* 122, 209–220.
41. Hagenbuchner, J., Kuznetsov, A.V., Obexer, P., and Ausserlechner, M.J. (2013). BIRC5/Survivin enhances aerobic glycolysis and drug resistance by altered regulation of the mitochondrial fusion/fission machinery. *Oncogene* 32, 4748–4757.
42. Seo, J.H., Agarwal, E., Chae, Y.C., Lee, Y.G., Garlick, D.S., Storaci, A.M., Ferrero, S., Gaudio, G., Gianelli, U., Vaira, V., and Altieri, D.C. (2019). Mitochondrial fission factor is a novel Myc-dependent regulator of mitochondrial permeability in cancer. *EBioMedicine* 48, 353–363.
43. Voorhoeve, P.M., le Sage, C., Schrier, M., Gillis, A.J., Stoop, H., Nagel, R., Liu, Y.P., van Duijse, J., Drost, J., Griekspoor, A., et al. (2006). A genetic screen implicates miRNA-372 and miRNA-373 as oncogenes in testicular germ cell tumors. *Cell* 124, 1169–1181.
44. Cairo, S., Wang, Y., de Reyniès, A., Durouze, K., Dahan, J., Redon, M.J., Fabre, M., McClelland, M., Wang, X.W., Croce, C.M., and Buendia, M.A. (2010). Stem cell-like micro-RNA signature driven by Myc in aggressive liver cancer. *Proc. Natl. Acad. Sci. U S A* 107, 20471–20476.
45. Crosby, M.E., Kulshreshtha, R., Ivan, M., and Glazer, P.M. (2009). MicroRNA regulation of DNA repair gene expression in hypoxic stress. *Cancer Res.* 69, 1221–1229.
46. Liu, X., and Hajnóczky, G. (2011). Altered fusion dynamics underlie unique morphological changes in mitochondria during hypoxia-reoxygenation stress. *Cell Death Differ.* 18, 1561–1572.
47. Sabouny, R., and Shutt, T.E. (2020). Reciprocal regulation of mitochondrial fission and fusion. *Trends Biochem. Sci.* 45, 564–577.
48. Vafa, O., Wade, M., Kern, S., Beeche, M., Pandita, T.K., Hampton, G.M., and Wahl, G.M. (2002). c-Myc can induce DNA damage, increase reactive oxygen species, and mitigate p53 function: a mechanism for oncogene-induced genetic instability. *Mol. Cell* 9, 1031–1044.
49. Ray, S., Atkuri, K.R., Deb-Basu, D., Adler, A.S., Chang, H.Y., Herzenberg, L.A., and Felsher, D.W. (2006). MYC can induce DNA breaks *in vivo* and *in vitro* independent of reactive oxygen species. *Cancer Res.* 66, 6598–6605.
50. López-Terrada, D., Alaggio, R., de Dávila, M.T., Czauderna, P., Hiyama, E., Katzenstein, H., Leuschner, I., Malogolowkin, M., Meyers, R., Ranganathan, S., et al. (2014). Towards an international pediatric liver tumor consensus classification: proceedings of the Los Angeles COG liver tumors symposium. *Mod. Pathol.* 27, 472–491.
51. von Schweinitz, D. (2006). Management of liver tumors in childhood. *Semin. Pediatr. Surg.* 15, 17–24.
52. Xu, P., Widmer, G., Wang, Y., Ozaki, L.S., Alves, J.M., Serrano, M.G., Puiu, D., Manque, P., Akiyoshi, D., Mackey, A.J., et al. (2004). The genome of *Cryptosporidium hominis*. *Nature* 431, 1107–1112.
53. Poli, V., Fagnocchi, L., Fasciani, A., Cherubini, A., Mazzoleni, S., Ferrillo, S., Miluzio, A., Gaudio, G., Vaira, V., Turdo, A., et al. (2018). MYC-driven epigenetic

- reprogramming favors the onset of tumorigenesis by inducing a stem cell-like state. *Nat. Commun.* 9, 1024.
54. Armengol, C., Cairo, S., Fabre, M., and Buendia, M.A. (2011). Wnt signaling and hepatocarcinogenesis: the hepatoblastoma model. *Int. J. Biochem. Cell Biol.* 43, 265–270.
  55. Zhou, S., Parham, D.M., Yung, E., Pattengale, P., and Wang, L. (2015). Quantification of glypican 3,  $\beta$ -catenin and claudin-1 protein expression in hepatoblastoma and paediatric hepatocellular carcinoma by colour deconvolution. *Histopathology* 67, 905–913.
  56. Luo, J.H., Ren, B., Keryanov, S., Tseng, G.C., Rao, U.N., Monga, S.P., Strom, S., Demetris, A.J., Nalesnik, M., Yu, Y.P., et al. (2006). Transcriptomic and genomic analysis of human hepatocellular carcinomas and hepatoblastomas. *Hepatology* 44, 1012–1024.
  57. Dezso, K., Halász, J., Bisgaard, H.C., Paku, S., Turányi, E., Schaff, Z., and Nagy, P. (2008). Delta-like protein (DLK) is a novel immunohistochemical marker for human hepatoblastomas. *Virchows Arch.* 452, 443–448.
  58. Li, L., Pilo, G.M., Li, X., Cigliano, A., Latte, G., Che, L., Joseph, C., Mela, M., Wang, C., Jiang, L., et al. (2016). Inactivation of fatty acid synthase impairs hepatocarcinogenesis driven by AKT in mice and humans. *J. Hepatol.* 64, 333–341.
  59. Huang, Q., Li, J., Xing, J., Li, W., Li, H., Ke, X., Zhang, J., Ren, T., Shang, Y., Yang, H., et al. (2014). CD147 promotes reprogramming of glucose metabolism and cell proliferation in HCC cells by inhibiting the p53-dependent signaling pathway. *J. Hepatol.* 61, 859–866.
  60. Chaudhry, A., Shi, R., and Luciani, D.S. (2020). A pipeline for multidimensional confocal analysis of mitochondrial morphology, function, and dynamics in pancreatic  $\beta$ -cells. *Am. J. Physiol. Endocrinol. Metab.* 318, E87–e101.
  61. Sun, X., Zhan, L., Chen, Y., Wang, G., He, L., Wang, Q., Zhou, F., Yang, F., Wu, J., Wu, Y., et al. (2018). Increased mtDNA copy number promotes cancer progression by enhancing mitochondrial oxidative phosphorylation in microsatellite-stable colorectal cancer. *Signal Transduct. Target. Ther.* 3, 8.
  62. Ji, L., Zhao, Y., He, L., Zhao, J., Gao, T., Liu, F., Qi, B., Kang, F., Wang, G., Zhao, Y., et al. (2021). Deficiency attenuates diet-induced obesity and insulin resistance by promoting fatty acid oxidation and thermogenesis in Brown adipocytes. *Adv. Sci. (Weinh)* 8, 2002794.
  63. Carrillo-Reixach, J., Torrens, L., Simon-Coma, M., Royo, L., Domingo-Sabat, M., Abril-Fornaguera, J., Akers, N., Sala, M., Ragull, S., Arnal, M., et al. (2020). Epigenetic footprint enables molecular risk stratification of hepatoblastoma with clinical implications. *J. Hepatol.* 73, 328–341.
  64. Sumazin, P., Chen, Y., Treviño, L.R., Sarabia, S.F., Hampton, O.A., Patel, K., Mistretta, T.-A., Zorman, B., Thompson, P., Heczey, A., et al. (2017). Genomic analysis of hepatoblastoma identifies distinct molecular and prognostic subgroups. *Hepatology* 65, 104–121.
  65. Gerstner, N., Kehl, T., Lenhof, K., Müller, A., Mayer, C., Eckhart, L., Grammes, N.L., Diener, C., Hart, M., Hahn, O., et al. (2020). GeneTrail 3: advanced high-throughput enrichment analysis. *Nucleic Acids Res.* 48, W515–W520.
  66. Wang, G., Wang, Q., Huang, Q., Chen, Y., Sun, X., He, L., Zhan, L., Guo, X., Yin, C., Fang, Y., et al. (2019). Upregulation of mtSSB by interleukin-6 promotes cell growth through mitochondrial biogenesis-mediated telomerase activation in colorectal cancer. *Int. J. Cancer* 144, 2516–2528.
  67. Agarwal, V., Bell, G.W., Nam, J.-W., and Bartel, D.P. (2015). Predicting effective microRNA target sites in mammalian mRNAs. *Elife* 4, e05005.
  68. Chen, Y., and Wang, X. (2020). miRDB: an online database for prediction of functional microRNA targets. *Nucleic Acids Res.* 48, D127–D131.



## Supplemental Information

### **Mitochondrial fragmentation is crucial for *c-Myc*-driven hepatoblastoma-like liver tumors**

**Dalin Wang, Jiming Tian, Zeyu Yan, Qing Yuan, Dan Wu, Xiaoli Liu, Shirong Yang, Shanshan Guo, Jianxun Wang, Yongxiu Yang, Jinliang Xing, Jiaze An, and Qichao Huang**

## Supplemental Figures

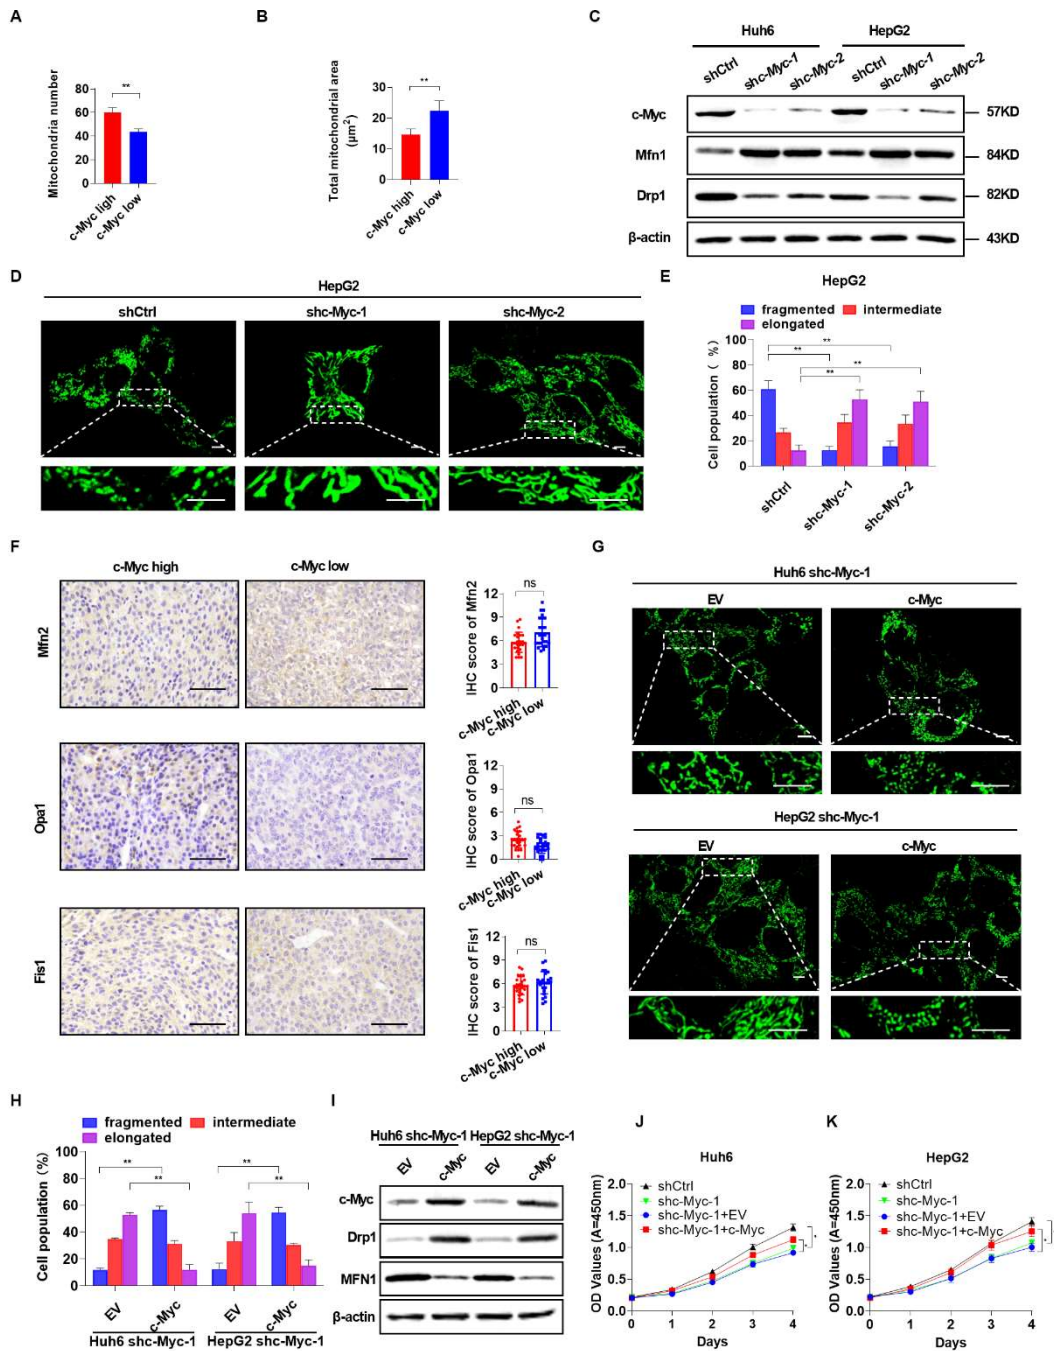

1

2 **Figure S1.**

3 (A) The number and (B) total area of mitochondria were analyzed from five random fields

4 ( $120\mu\text{m}^2$ ) in HB tissues with high (n=5) or low (n=5) expression levels of c-Myc.

5 (C) Western blotting images of c-Myc, Mfn1 and Drp1 in Huh6 and HepG2 cells with

6 treatment as indicated. shctrl, control shRNA; shc-Myc-1 and shc-Myc-2, shRNA against c-  
7 Myc.

8 **(D and E)** Representative confocal microscopy images and morphology distribution analysis  
9 of mitochondria in HepG2 cells with or without c-Myc knockdown. Scale bars: 10  $\mu$ m.

10 **(F)** Representative immunohistochemical (IHC) staining images of Mfn2, Opa1 and Fis1 in  
11 HB tissues with high (n=25) and low (n=25) c-Myc expression. Scale bar: 50 $\mu$ m.

12 **(G and H)** Representative confocal microscopy images and morphology distribution analyses  
13 of mitochondria in c-Myc knockdown HB cells with or without c-Myc overexpression. Scale  
14 bars: 10  $\mu$ m. EV, empty vector; c-Myc, expression vector encoding c-Myc.

15 **(I)** Western blotting images of c-Myc, Drp1 and Mfn1 in HB cells with treatment as indicated.

16 **(J and K)** Cell proliferation was analyzed by CCK-8 in HB cells with treatment as indicated.

17 Data were expressed as mean  $\pm$  SD. ns, no significant; \*p< 0.05; \*\*p< 0.01.

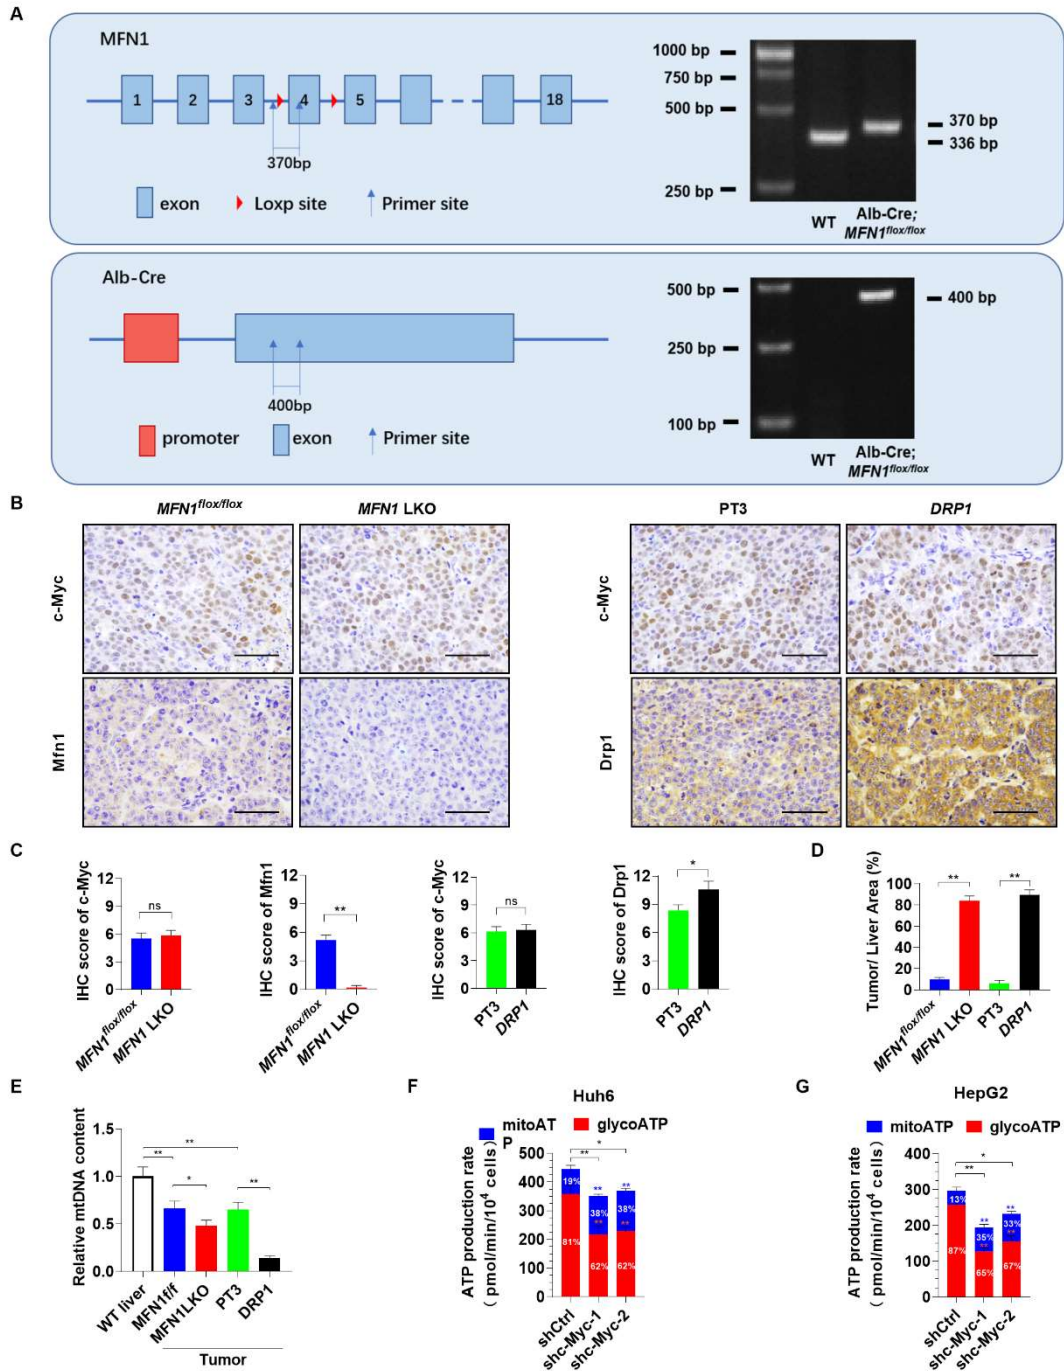

18

19 **Figure S2.**

20 **(A)** Schematic diagram of LoxP site in the exons of *MFN1* and Cre recombinant protease with  
 21 ALB promoter. Genomic DNA extracted from the tail of the mice was used for genotype  
 22 identification by performing PCR and agarose gel electrophoresis. WT, wild type.

23 **(B)** Representative immunohistochemical (IHC) staining images of c-Myc and Mfn1 in *c-Myc*

24 induced models with (n=12) or without (n=12) liver specifically knockout of *MFN1*. While  
25 representative IHC staining images of c-Myc and Drp1 in mouse models induced by *c-Myc*  
26 and PT3 control plasmids (n=12) or *c-Myc* plasmid and *DRP1* expression construct (n=12).  
27 Scale bar: 50 $\mu$ m. *MFN1*<sup>fl $\alpha$ /fl $\alpha$</sup> , *MFN1*<sup>fl $\alpha$ /fl $\alpha$</sup>  mice hydrodynamically injected with *c-Myc*  
28 plasmid and SB transposon; *MFN1* LKO, *MFN1* liver specific knockout mice  
29 hydrodynamically injected with *c-Myc* plasmid and SB transposon; PT3, wild type mice  
30 hydrodynamically injected with *c-Myc* plasmid and PT3-EF1 $\alpha$  empty vector, as well as SB  
31 transposon; *DRP1*, wild type mice hydrodynamically injected with *c-Myc* plasmid and PT3-  
32 EF1 $\alpha$ -DRP1 construct, as well as SB transposon.

33 **(C)** IHC scores of c-Myc, Mfn1 and Drp1 in mouse models induced as indicated.

34 **(D)** Percentage of tumor/liver area of the mice with treatment as indicated.

35 **(E)** Relative mtDNA content in mouse normal liver and the tumors induced by c-Myc from  
36 different groups as indicated.

37 **(F and G)** Glyco, Mito and total ATP production rate were measured between HB cells  
38 treated as indicated. Blue asterisks are used for Mito ATP, red asterisks are used for Glyco  
39 ATP, and black asterisks are used for total ATP (glycol ATP + Mito ATP) production rate  
40 comparisons between shctrl and shc-Myc groups. The percentage inside the bar represents the  
41 percentage of total ATP production rate generated from Glyco or Mito ATP production rate for  
42 each condition.

43 Data were expressed as mean  $\pm$  SD. ns, no significant; \*p< 0.05; \*\*p< 0.01.

44

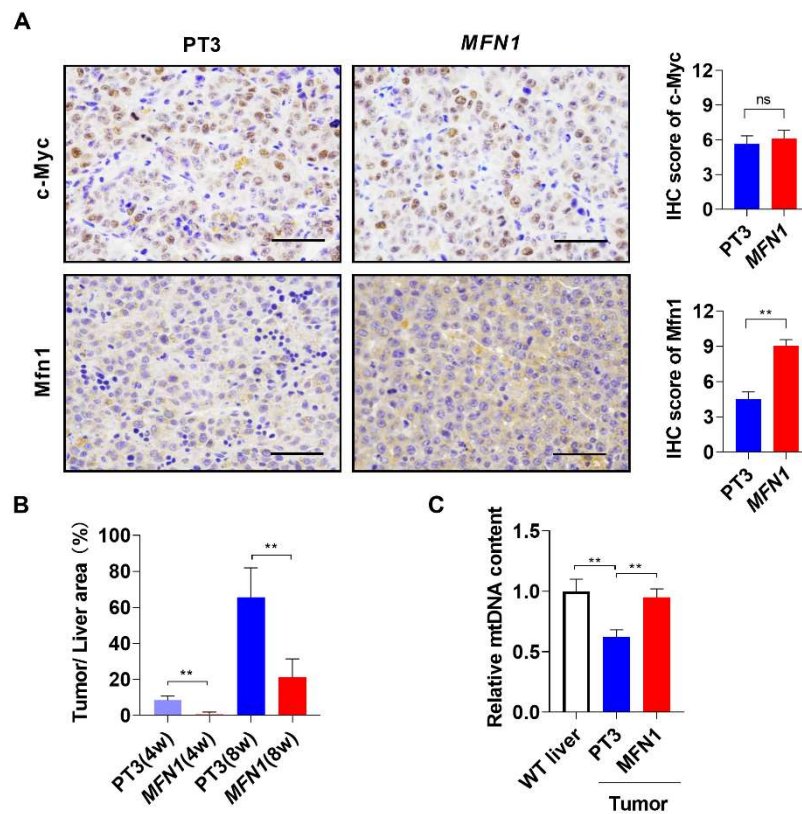

45

46 **Figure S3.**

47 **(A)** Representative IHC staining images and IHC scores of c-Myc and Mfn1 in mouse models  
 48 induced by *c-Myc* and PT3 control plasmids (n=12) or *c-Myc* plasmids and *MFN1* expression  
 49 construct (n=12). Scale bar: 50 $\mu$ m. PT3, wild type mice hydrodynamically injected with *c-*  
 50 *Myc* plasmid and PT3-EF1 $\alpha$  empty vector, as well as SB transposon; *MFN1*, wild type mice  
 51 hydrodynamically injected with *c-Myc* plasmid and PT3-EF1 $\alpha$ -MFN1 construct, as well as  
 52 SB transposon.

53 **(B)** Percentage of tumor/liver area of the mice with treatment as indicated.

54 **(C)** Relative mtDNA content in mouse normal liver and the tumors induced by *c-Myc* from  
 55 different groups as indicated.

56 Data were expressed as mean  $\pm$  SD. ns, no significant; \*\*p< 0.01.

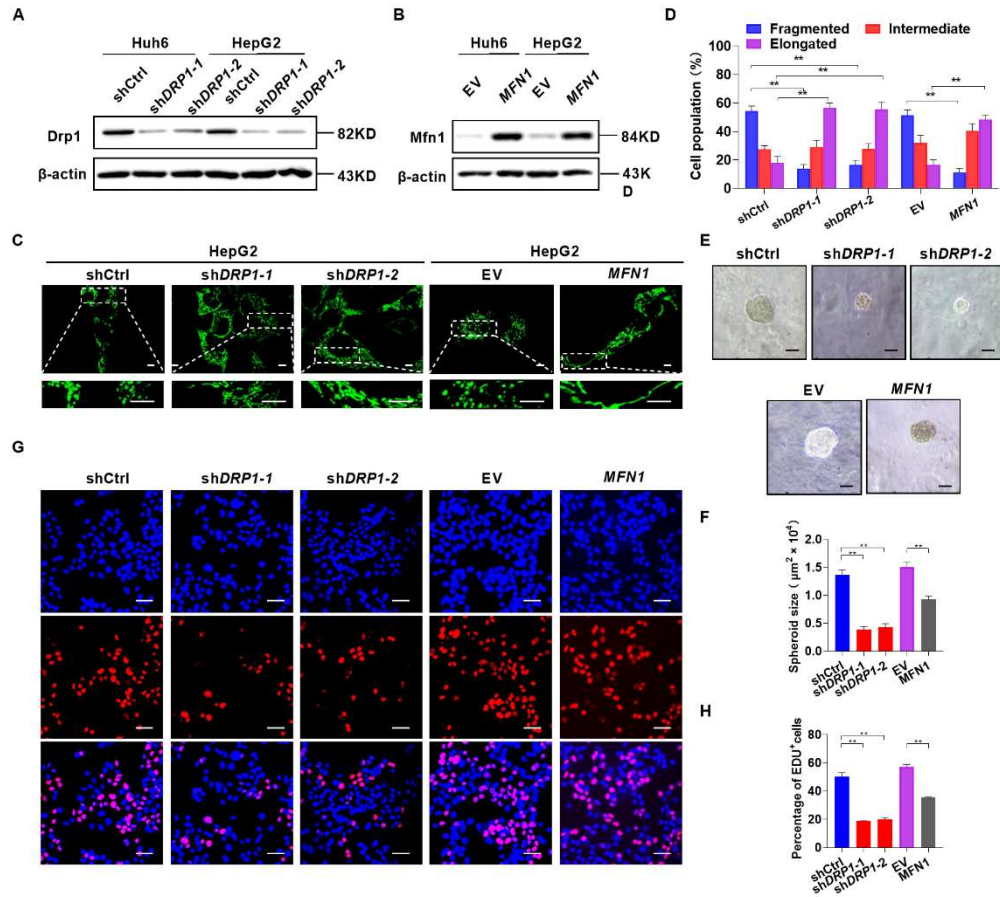

57

58 **Figure S4.**

59 **(A and B)** Western blotting images of Drp1 and Mfn1 in Huh6 and HepG2 treated as  
 60 indicated. shctrl, control shRNA; shDRP1-1 and shDRP1-2, shRNA against DRP1; EV, empty  
 61 vector; MFN1, expression vector encoding MFN1.

62 **(C-D)** Representative confocal microscopy images morphology distribution analyses of  
 63 mitochondria in HepG2 cells with treatment as indicated. Scale bars: 10 $\mu$ m.

64 **(E and F)** High-magnification images and size of spheres formed on day 7 by HepG2 cells  
 65 with treatment as indicated. Scale bar: 50 $\mu$ m.

66 **(G and H)** EdU assay was performed to evaluate proliferation ability of HepG2 cells with  
 67 treatment as indicated. Scale bar: 50 $\mu$

68 Data were expressed as mean  $\pm$  SD. \*\*p < 0.01.

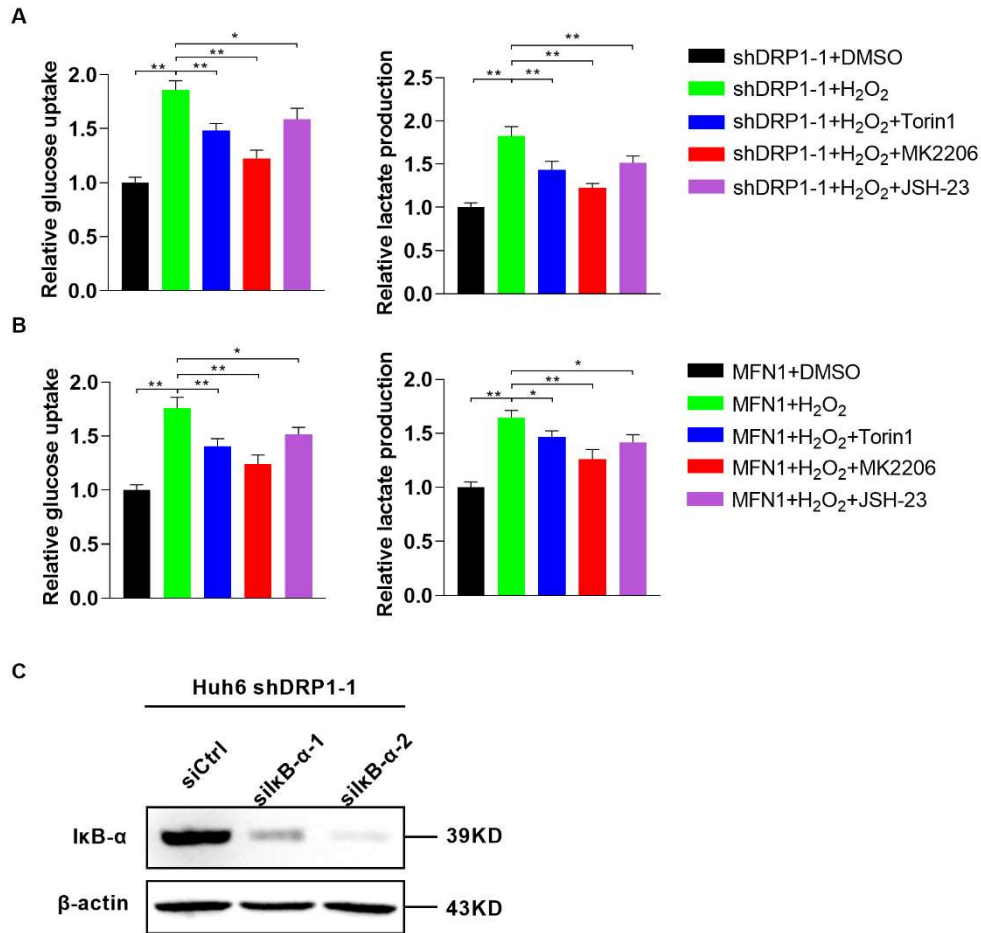

69

70 **Figure S5.**

71 **(A-B)** Relative glucose uptake and relative lactate production were measured in Huh6 cells

72 treated as indicated. shctrl, control shRNA; sh*DRP1-1*, shRNA against *DRP1*; *MFN1*,

73 expression vector encoding *MFN1*.

74 **(C)** Western blotting images of IκB-α in Huh6 treated as indicated.

75 Data were expressed as mean ± SD. \*p< 0.05; \*\*p< 0.01.



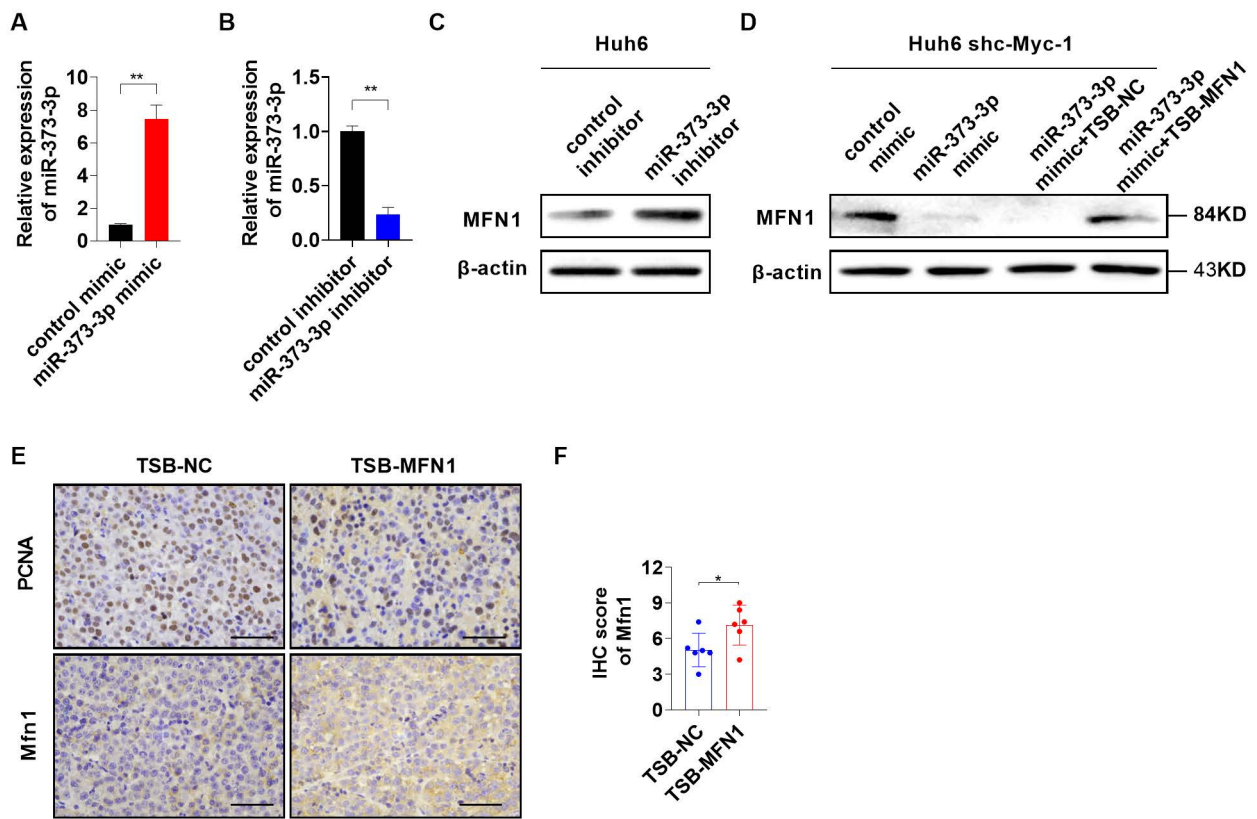

76

77 **Figure S6.**

78 **(A and B)** Quantitative real-time reverse transcription PCR (qRT-PCR) analyses for  
 79 expression levels of miR-373-3p in Huh6 treated as indicated.

80 **(C and D)** Western blotting images of Mfn1 in Huh6 cells treated as indicated. shc-Myc-1,  
 81 shRNA against c-Myc, TSB-NC, negative control of miRNA target site blocker; TSB-MFN1,  
 82 a target site blocker which selectively prevents miR-373-3p binding to the 3'UTR of MFN1.

83 **(E)** Representative immunohistochemical (IHC) staining images of PCNA and MFN1 in  
 84 subcutaneous xenograft tumors. Scale bar: 50 $\mu$ m.

85 **(F)** IHC scores of MFN1 in subcutaneous xenograft tumors.

86 Data were expressed as mean  $\pm$  SD. \* $p$  < 0.05; \*\* $p$  < 0.01.

87

88

89

## Supplemental Tables

90 **Table S1. Distribution of HB patients' characteristics**

| Variable                     | All patients, n=50 |
|------------------------------|--------------------|
| <b>Age</b>                   |                    |
| <5 years                     | 44                 |
| >=5 years                    | 6                  |
| <b>Gender</b>                |                    |
| Female                       | 30                 |
| Male                         | 20                 |
| <b>Tumor size</b>            |                    |
| <5.0 cm                      | 21                 |
| >=5 cm                       | 29                 |
| <b>Differentiation grade</b> |                    |
| well                         | 18                 |
| Moderately                   | 18                 |
| Poor                         | 14                 |
| <b>pretext stage</b>         |                    |
| I+ II                        | 23                 |
| III+ IV                      | 27                 |
| <b>Survival</b>              |                    |
| Dead                         | 13                 |
| Alive                        | 37                 |

91

92

93

94

95 **Table S2. Sequences of primers, siRNA, miRNA mimic and inhibitor, TSB, and mRNA**

96 **sequence for shRNA**

| Primer name                          |                 | Sequences                 |
|--------------------------------------|-----------------|---------------------------|
| <b>1. Primers for real-time PCR:</b> |                 |                           |
| <i>c-Myc</i>                         | forward primer: | CATACATCCTGTCCGTCCAAG     |
|                                      | reverse primer: | GAGTTCCGTAGCTGTTCAAGT     |
| <i>DRP1</i>                          | forward primer: | GGAGACTCATCTTTGGTGAAGAG   |
|                                      | reverse primer: | AAGGAGCCAGTCAAATTATTGC    |
| <i>MFN1</i>                          | forward primer: | TGGCTAAGAAGGCGATTACTGC    |
|                                      | reverse primer: | TCTCCGAGATAGCACCTCACC     |
| <i>GAPDH</i>                         | forward primer: | GGAGCGAGATCCCTCCAAAAT     |
|                                      | reverse primer: | GGCTGTTGTCATACTTCTCATGG   |
| miR-373-3p                           | RT primer:      | CTCAACTGGTGTCGTGGAGTCGGCA |
|                                      | forward primer: | TCGGCAGGCTTCACGAAGCTAA    |
|                                      | reverse primer: | GGTGTCGTGGAGTCGGCAATTC    |
| miR-200a-3p                          | RT primer:      | CTCAACTGGTGTCGTGGAGTCGGCA |
|                                      | forward primer: | TCGGCAGGATTGTGACAGACCA    |
|                                      | reverse primer: | GGTGTCGTGGAGTCGGCAATTC    |
| miR-4319                             | RT primer:      | CTCAACTGGTGTCGTGGAGTCGGCA |
|                                      | forward primer: | TCGGCAGGAGGGACTCGTT       |
|                                      | reverse primer: | GGTGTCGTGGAGTCGGCAATTC    |
| miR-302c-3p                          | RT primer:      | CTCAACTGGTGTCGTGGAGTCGGCA |
|                                      | forward primer: | TCGGCAGGATTCACGAAGGTAC    |
|                                      | reverse primer: | GGTGTCGTGGAGTCGGCAATTC    |
| miR-3129-5p                          | RT primer:      | CTCAACTGGTGTCGTGGAGTCGGCA |
|                                      | forward primer: | TCGGCAGGCGTCATCACATCTC    |
|                                      | reverse primer: | GGTGTCGTGGAGTCGGCAATTC    |

---

## 2. Primers for gene cloning

|             |                 |                            |
|-------------|-----------------|----------------------------|
| <i>DRP1</i> | forward primer: | CCGGAATTCTAGCCAGTCTCCACAT  |
|             | reverse primer: | CGCGGATCCGGCCCCGTGTTTTTCAG |
| <i>MFN1</i> | forward primer: | ACGAATTCCTTGCCACCATGGCAGA  |
|             | reverse primer: | ACCTCGAGTGTTAGGATTCTTCATT  |

---

## 3. Primers for DRP1 promoter construct

---

|                  |                 |                                           |
|------------------|-----------------|-------------------------------------------|
| (-1894/+103)DRP1 | forward primer: | <u>TAGGTACCA</u> CTCCTGACCTCAAGTG         |
| (-961/+103)DRP1  | forward primer: | <u>TAGGTACCT</u> CCTGCTTCTGCTTCCTA        |
| (-514/+103)DRP1  | forward primer: | <u>TAGGTACCC</u> AGGAGAATGGCGTGA          |
| (-244/+103)DRP1  | forward primer: | <u>TAGGTACCT</u> AGCCTTTGACTAGAGC         |
| (-11/+103)DRP1   | forward primer: | <u>TAGGTACC</u> AGGAAGGAGGCGAACT          |
|                  | reverse primer: | <u>GAAGATCT</u> GGAGCTTGTTTATGACA<br>GGAA |

---

## 4. Primers for DRP1 promoter site-directed mutagenesis

---

|                           |                 |                                       |
|---------------------------|-----------------|---------------------------------------|
| (-961/+103) DRP1 mutation | forward primer: | CCTCCCGGCAGGCCAAAAGCTGCG<br>AGGGAGGTG |
| (-961/+103) DRP1 mutation | reverse primer: | CACCTCCCTCGCAGCTTTTGGCCTG<br>CCGGGAGG |

---

## 5. Primers for CHIP in the DRP1 promoter

---

|      |                 |                      |
|------|-----------------|----------------------|
| DRP1 | forward primer: | CTCCGCTCCAGAACTACAAC |
|      | reverse primer: | TACCAACAGTACCGGAATGC |

---

## 6. mRNA sequence for shRNA and siRNA sequences

---

|                   |               |                             |
|-------------------|---------------|-----------------------------|
| shDrp1-1          | mRNA sequence | GCTACTTTACTCCA ACTTATT      |
| shDrp1-2          | mRNA sequence | CGAGATTGTGAGGTTATTGAA       |
| shc-Myc-1         | mRNA sequence | CTGAGACAGATCAGCAACAA        |
| shc-Myc-2         | mRNA sequence | GGAAACGACGAGAACAGTTGA       |
| shctrl            | mRNA sequence | UUCUCCGAACGUGUCACGU         |
| siIkB $\alpha$ -1 |               | 5'-GCUAUUCUCCCUACCA AGCU-3' |

|          |                             |
|----------|-----------------------------|
| siIκBα-2 | 5'-GCUGCCCUAUGAUGACUGU-3'   |
| sictrl   | 5'-UUCUCCGAACGUGUCACGUTT-3' |

### 7. Primers for genotyping

|              |                 |                        |
|--------------|-----------------|------------------------|
| MFN1 (mouse) | forward primer: | AGCAGTTGGTTGTGTGACCA   |
|              | reverse primer: | TTGGTAATCTTTAGCGGTGCTC |
| Cre (mouse)  | forward primer: | TGGCAAACATACGCAAGGG    |
|              | reverse primer: | CGGCAAACGGACAGAAGCA    |

### 8. miRNA mimic and inhibitor

|                  |            |                         |
|------------------|------------|-------------------------|
| miR-373-3p mimic | sense:     | GAAGUGCUUCGAUUUUGGGGUGU |
|                  | antisense: | ACCCCAAAAUCGAAGCACUUCUU |
| control mimic    | sense:     | UUCUCCGAACGUGUCACGUTT   |
|                  | antisense: | ACGUGACACGUUCGGAGAATT   |
| miR-373-3p       | inhibitor: | ACACCCCAAAAUCGAAGCACUUC |
| control          | inhibitor: | CAGUACUUUUGUGUAGUACAA   |

### 9. Primers for mtDNA measurement

|          |                 |                          |
|----------|-----------------|--------------------------|
| ND1      | forward primer: | CTAGCAGAAACAAACCGGGC     |
|          | reverse primer: | CCGGCTGCGTATTCTACGTT     |
| 16S rRNA | forward primer: | CCGCAAGGGAAAGATGAAAGAC   |
|          | reverse primer: | TCGTTTGGTTTCGGGGTTTC     |
| HK2      | forward primer: | GCCAGCCTCTCCTGATTTTAGTGT |
|          | reverse primer: | GGGAACACAAAAGACCTCTTCTGG |

### 10. Sequence of Target Site Blocker

|          |                         |
|----------|-------------------------|
| TSB-MFN1 | TGAAATCTGGTTAAAAGCACTTT |
| TSB-NC   | TAACACGTCTATACGCCCA     |

98 **Table S3. Primary antibodies used for Western blotting and immunohistochemistry**

| <b>Antibody</b>  | <b>Company (Cat. No.)</b>            | <b>Working dilutions</b> |
|------------------|--------------------------------------|--------------------------|
| MFN1             | abcam (ab104585)                     | WB: 1/1000 IHC:1/150     |
| MFN2             | abcam (ab101055)                     | IHC:1/100                |
| DRP1             | abcam (ab56788)                      | WB: 1/1000 IHC: 1/150    |
| FIS1             | abcam (ab156865)                     | IHC: 1/10000             |
| OPA1             | abcam (ab90857)                      | IHC: 1/400               |
| c-Myc            | Proteintech (67447-1-Ig)             | WB: 1/500 IHC: 1/300     |
| c-Myc            | Proteintech (10828-1-AP)             | Chip:1/50                |
| AKT              | Cell Signaling Technology (9272)     | WB: 1/1000               |
| p-AKT            | Cell Signaling Technology (4051)     | WB: 1/600                |
| $\beta$ -actin   | Beijing TDY BIOTECH CO., Ltd.        | WB: 1/3000               |
| NF-kB            | abcam(ab7970)                        | WB: 1/1000               |
| IKB $\alpha$     | abcam(ab76429)                       | WB: 1/1000               |
| LMNB1            | Beijing TDY BIOTECH CO., Ltd.        | WB: 1/2000               |
| p-IKK            | Santa Cruz Biotechnology (C-23470-R) | WB:1/1000                |
| p70S6K           | Cell Signaling Technology (9202)     | WB: 1/1000               |
| p-p70S6K(Thr389) | Cell Signaling Technology (9234)     | WB: 1/1000               |
| PCNA             | abcam (ab18197)                      | IHC:1/15000              |

99

100

101

102

103

104

105

**Table S4. Public datasets used for bioinformatics analyses**

| <b>Accession No.</b> | <b>Platform</b>                                              | <b>HB Sample No.</b> | <b>Patient Ethnicity</b>                              | <b>PMID</b> | <b>Source URL</b>                                                                                                                       |
|----------------------|--------------------------------------------------------------|----------------------|-------------------------------------------------------|-------------|-----------------------------------------------------------------------------------------------------------------------------------------|
| GSE133039            | Illumina<br>HiSeq 2500<br>(Homo sapiens)<br>[HG-U133_Plus_2] | 66                   | -                                                     | 32240714    | <a href="https://www.ncbi.nlm.nih.gov/geo/query/acc.cgi?acc=GSE133039">https://www.ncbi.nlm.nih.gov/geo/query/acc.cgi?acc=GSE133039</a> |
| GSE75271             | Affymetrix<br>Human Genome<br>U133 Plus 2.0<br>Array         | 50                   | Hispanic<br>Caucasian<br>Asian<br>African<br>American | 27775819    | <a href="https://www.ncbi.nlm.nih.gov/geo/query/acc.cgi?acc=GSE75271">https://www.ncbi.nlm.nih.gov/geo/query/acc.cgi?acc=GSE75271</a>   |
